# Supplementary material
Source: PubMed Central journal article supplement (PMC6698938)
Supplement: mmc1.pdf [file mmc1.pdf]

## Supplemental Data

### Mutations in *PIGB* Cause an Inherited GPI

### Biosynthesis Defect with an Axonal Neuropathy

### and Metabolic Abnormality in Severe Cases

Yoshiko Murakami, Thi Tuyet Mai Nguyen, Nissan Baratang, Praveen K. Raju, Alexej Knaus, Sian Ellard, Gabriela Jones, Baiba Lace, Justine Rousseau, Norbert Fonya Ajeawung, Atsushi Kamei, Gaku Minase, Manami Akasaka, Nami Araya, Eriko Koshimizu, Jenneke van den Ende, Florian Erger, Janine Altmüller, Zita Krumina, Jurgis Strautmanis, Inna Inashkina, Janis Stavusis, Areeg El-Gharbawy, Jessica Sebastian, Ratna Dua Puri, Samarth Kulshrestha, Ishwar C. Verma, Esther M. Maier, Tobias B. Haack, Anil Israni, Julia Baptista, Adam Gunning, Jill A. Rosenfeld, Pengfei Liu, Marieke Joosten, María Eugenia Rocha, Mais O. Hashem, Hesham M. Aldhalaan, Fowzan S. Alkuraya, Satoko Miyatake, Naomichi Matsumoto, Peter M. Krawitz, Elsa Rossignol, Taroh Kinoshita, and Philippe M. Campeau

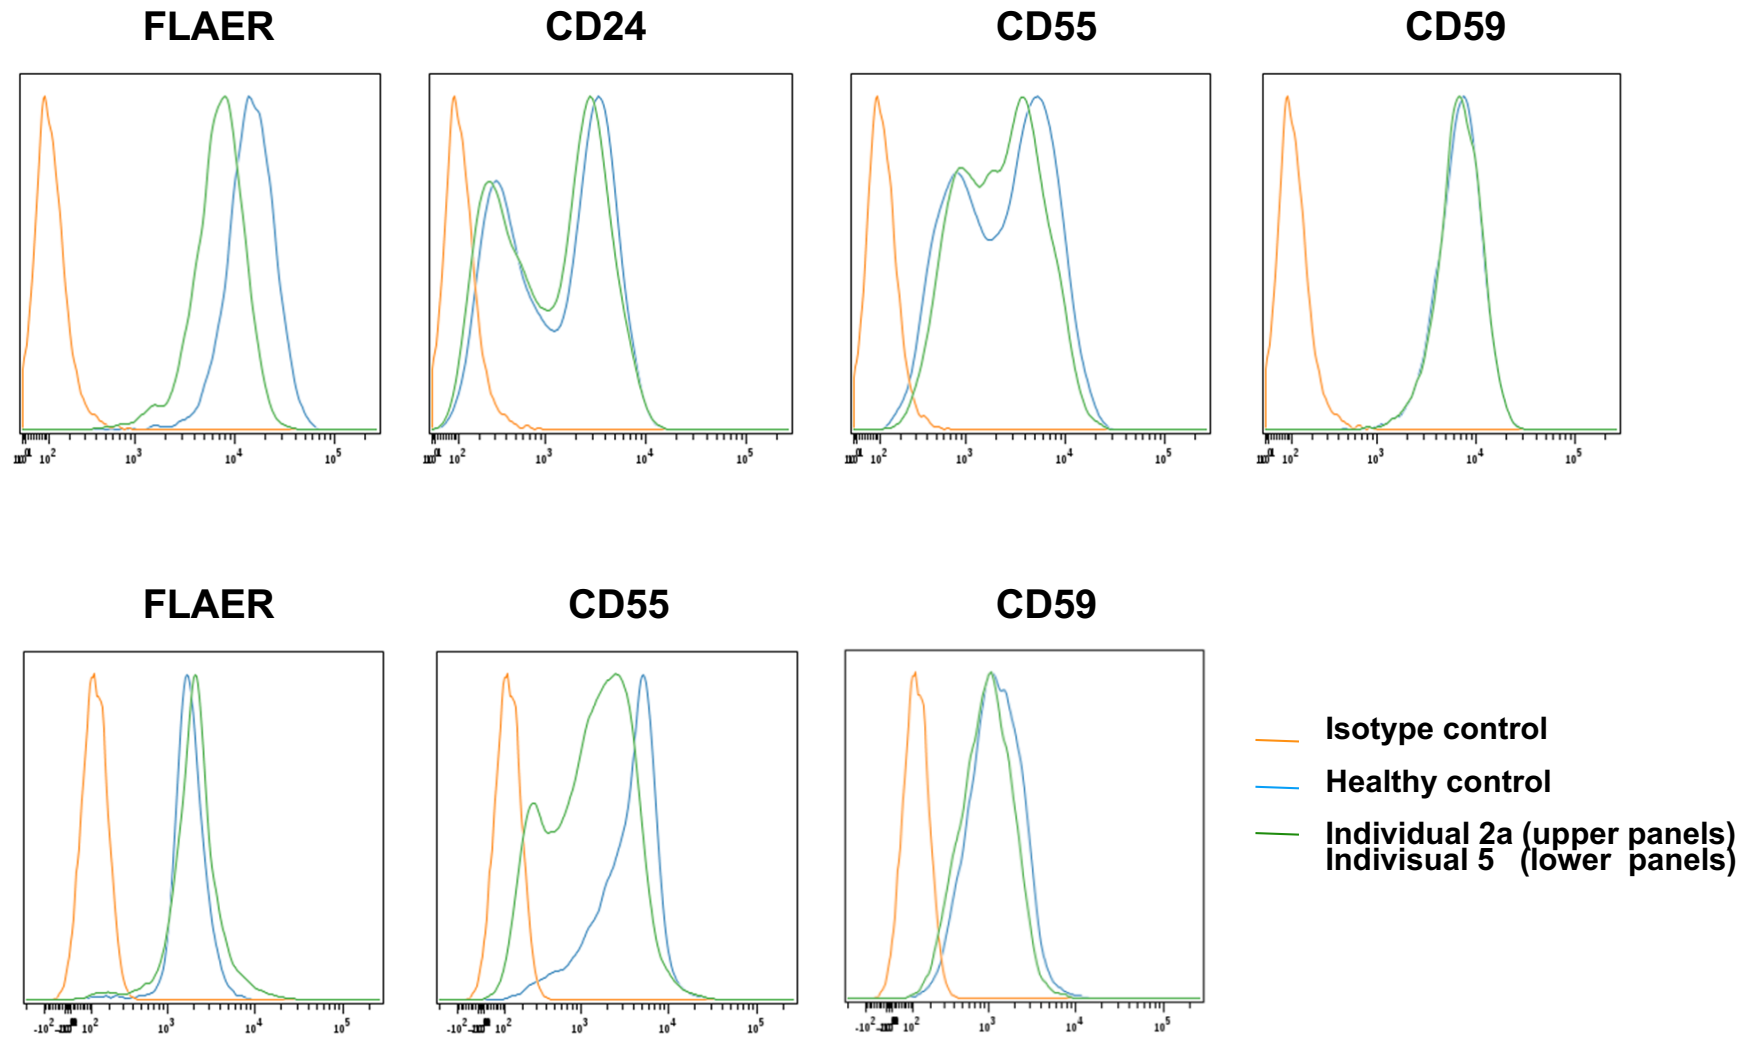

**Figure S1. Flow cytometry analysis of cell surface GPI-APs of lymphoblastoids and lymphocytes of individual 2a and 5, respectively.** : Upper panels, LCLs of individual 2a established by Epstein-Barr virus immortalization of peripheral blood mononuclear cells (PBMC) were stained with GPI-AP markers (FLAER, CD24, CD55 and CD59). Lower panels, lymphocyte population from blood sample of individual 5 in the same experiments shown in Figure 5B was gated to analyze using the Cytobank software. The figure shows representative results from experiments done in triplicate.

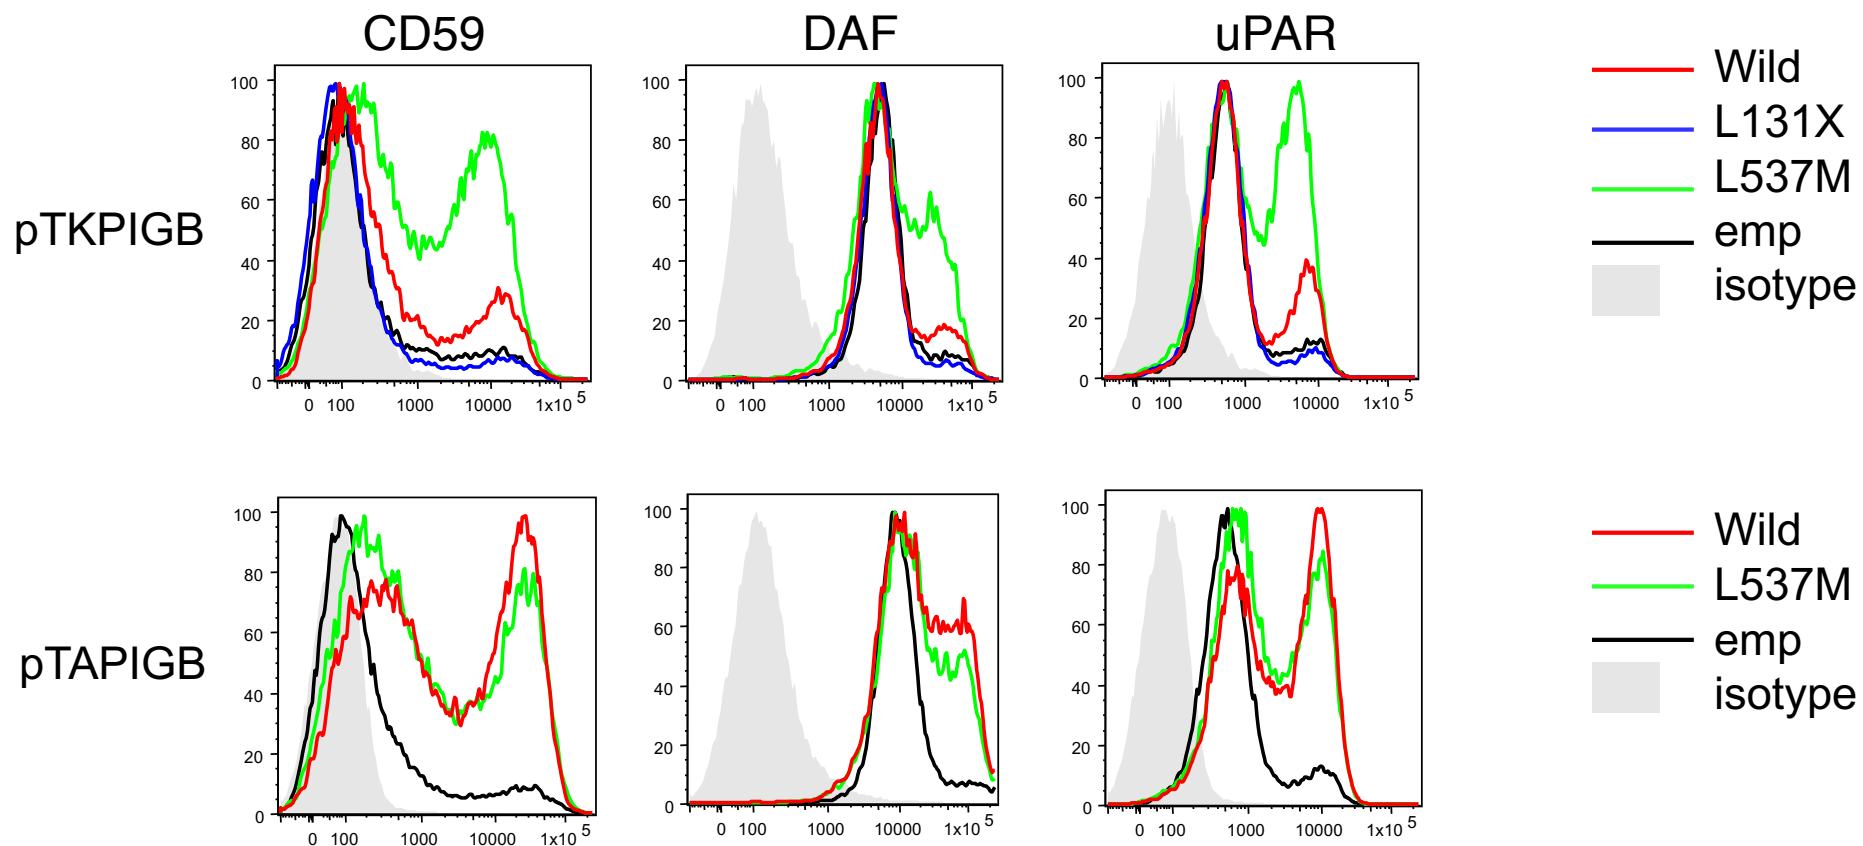

**Figure S2. Functional analysis of the mutant *PIGB* cDNAs found in family 5 using weak promoters:**

*PIGB*-deficient CHO cells were transiently transfected with wild-type and mutant *PIGB* cDNAs subcloned in pTK (medium strong promoter) (upper panels) and in pTA (weak promoter) (lower panels). Restoration of the surface expression of CD59, CD55 (DAF) and uPAR was assessed 2 days later by flow cytometry. Black lines, empty vector; green and blue lines, various mutant *PIGB*; red line, wild-type *PIGB*; light-gray shadows, isotype controls.

**Table S1. Detailed phenotypes**

| Family                           | 1                                                                                                         |                                                                                 | 2                |                                                                                                             | 3                                                                                                                                                                                                                                                                                                          | 4                                                  | 5                                                                | 6                                                                                                |                                                                                                  | 7                                                                              | 8                                                                                                                                                                                                       | 9                                                                                                                                                                                                                     | 10                                                                                                                                         |                                                                                                                                                                    |
|----------------------------------|-----------------------------------------------------------------------------------------------------------|---------------------------------------------------------------------------------|------------------|-------------------------------------------------------------------------------------------------------------|------------------------------------------------------------------------------------------------------------------------------------------------------------------------------------------------------------------------------------------------------------------------------------------------------------|----------------------------------------------------|------------------------------------------------------------------|--------------------------------------------------------------------------------------------------|--------------------------------------------------------------------------------------------------|--------------------------------------------------------------------------------|---------------------------------------------------------------------------------------------------------------------------------------------------------------------------------------------------------|-----------------------------------------------------------------------------------------------------------------------------------------------------------------------------------------------------------------------|--------------------------------------------------------------------------------------------------------------------------------------------|--------------------------------------------------------------------------------------------------------------------------------------------------------------------|
| Individual                       | 1a                                                                                                        | 1b                                                                              | 2a               | 2b                                                                                                          | 3                                                                                                                                                                                                                                                                                                          | 4                                                  | 5                                                                | 6a                                                                                               | 6b                                                                                               | 7                                                                              | 8a                                                                                                                                                                                                      | 9b                                                                                                                                                                                                                    | 10a                                                                                                                                        | 10b                                                                                                                                                                |
| Consanguinity                    | N                                                                                                         | N                                                                               | N                | N                                                                                                           | Y                                                                                                                                                                                                                                                                                                          | N                                                  | N                                                                | Y                                                                                                | Y                                                                                                | Y                                                                              | Y                                                                                                                                                                                                       | Y                                                                                                                                                                                                                     | N                                                                                                                                          | N                                                                                                                                                                  |
| Gender                           | M                                                                                                         | F                                                                               | F                | M                                                                                                           | F                                                                                                                                                                                                                                                                                                          | F                                                  | F                                                                | F                                                                                                | F                                                                                                | F                                                                              | M                                                                                                                                                                                                       | M                                                                                                                                                                                                                     | M                                                                                                                                          | M                                                                                                                                                                  |
| Age at last examination          | 5y                                                                                                        | 3.8y                                                                            | 13y              | 11m                                                                                                         | 6m                                                                                                                                                                                                                                                                                                         | 4y                                                 | 19y                                                              | 4m                                                                                               | 8m                                                                                               | 8m                                                                             | 2d (deceased)                                                                                                                                                                                           | 18m                                                                                                                                                                                                                   | 6 m                                                                                                                                        | 4 m                                                                                                                                                                |
| Height, cm                       | NA                                                                                                        | NA                                                                              |                  | 76                                                                                                          |                                                                                                                                                                                                                                                                                                            |                                                    | 158                                                              | 54                                                                                               | 66                                                                                               | 65                                                                             |                                                                                                                                                                                                         | 83                                                                                                                                                                                                                    | 63                                                                                                                                         | -                                                                                                                                                                  |
| Weight, kg                       | NA                                                                                                        | NA                                                                              |                  | 9.5                                                                                                         |                                                                                                                                                                                                                                                                                                            |                                                    | 75                                                               | 5.7                                                                                              | 8.66                                                                                             | 7.2                                                                            |                                                                                                                                                                                                         | 11.5                                                                                                                                                                                                                  | 4.5                                                                                                                                        | 5.8                                                                                                                                                                |
| OFC, cm                          | NA                                                                                                        | NA                                                                              |                  | 44.5                                                                                                        |                                                                                                                                                                                                                                                                                                            |                                                    | 55.5                                                             | 38.5                                                                                             | 43                                                                                               | 41.5                                                                           | large                                                                                                                                                                                                   | 46.2                                                                                                                                                                                                                  | 40                                                                                                                                         | -                                                                                                                                                                  |
| DD/ID                            | Y                                                                                                         | Y                                                                               | Y, +++           | Y, +++                                                                                                      | Y                                                                                                                                                                                                                                                                                                          | Y                                                  | Y                                                                | Y, +++                                                                                           | Y, +++                                                                                           | Y                                                                              |                                                                                                                                                                                                         |                                                                                                                                                                                                                       | Y                                                                                                                                          | Y                                                                                                                                                                  |
| Hypotonia                        | Y                                                                                                         | Y                                                                               | NA               | Y                                                                                                           | Y                                                                                                                                                                                                                                                                                                          | N                                                  | Y                                                                | Y                                                                                                | Y                                                                                                | Y                                                                              | NA                                                                                                                                                                                                      | Y                                                                                                                                                                                                                     | Y                                                                                                                                          | Y                                                                                                                                                                  |
| Seizures (and start)             | Y, Myoclonic 3w                                                                                           | Y, GTCS 3m                                                                      | Y, 6m            | Y, GTCS, 1m                                                                                                 | Y, with Hypsarrhythmia                                                                                                                                                                                                                                                                                     | Y, 1y                                              | Y, infantile                                                     | Y, 3d                                                                                            | Y, 3m                                                                                            | Y, 3m                                                                          | Y, 1d (on EEG)                                                                                                                                                                                          | Y, infantile                                                                                                                                                                                                          | Y, 2 w                                                                                                                                     | Y, 1 m                                                                                                                                                             |
| Seizure responsiveness           | NA                                                                                                        | Refractory                                                                      | Sodium valproate | Refractory                                                                                                  | NA                                                                                                                                                                                                                                                                                                         | Potassium bromide, Levetiracetam, Sodium valproate | Carbamazepine                                                    | Refractory                                                                                       | Sodium valproate, Phenytoin, Phenobarbital, Levetiracetam                                        | Refractory                                                                     | Phenobarbital Midazolam                                                                                                                                                                                 | Phenobarbital                                                                                                                                                                                                         | Levetiracetam                                                                                                                              | Refractory                                                                                                                                                         |
| Other neurological abnormalities | Axonal degenerative polyneuropathy                                                                        | Axonal degenerative polyneuropathy                                              | Absent reflexes  | Mixed axonal loss Demyelinating sensorimotor polyneuropathy. Absent reflexes                                | Poor feeding, absent otoacoustic emissions                                                                                                                                                                                                                                                                 | Epileptic encephalopathy                           | Hypohydrosis                                                     | NA                                                                                               | NA                                                                                               | Weak reflexes, Episodes of apnea                                               | NA                                                                                                                                                                                                      |                                                                                                                                                                                                                       | Poor feeding, Hyperthermia, Sensorimotor axonal polyneuropathy                                                                             | Poor suck, Mixed axonal and demyelinating polyneuropathy                                                                                                           |
| MRI                              | Normal posterior fossa Thin corpus callosum.                                                              | Hyperdensities in the pons cerebri callosum.                                    | Normal           | Normal at 5 m (Calcifications in left thalamus on ultrasound at 1 m)                                        | Mild dilatation of ventricles, Poor myelination, thinning of the white matter, diffusion restriction in the central tegmental tracts, hyperintensity of the globus pallidus scalloping of the calvarium related to delayed synostosis repair                                                               | Normal                                             | Normal                                                           | Normal                                                                                           | Normal                                                                                           | Dilatation of ventricles                                                       | Post-mortem MRI: Dandy walker malformation Vermis hypoplasia, Thin corpus callosum, Pontine hypoplasia. Possibly diffuse polymicrogyria, Possibly intracranial vessel tortuosity.                       | (9a)F Polymicrogyria along the bilateral occipital lobes. Diffuse cerebral volume loss. Hypomyelination in periventricular and subcortical white matter more pronounced at the bilateral occipital and frontal lobes. | 16 days Multiple foci of Altered signal intensity bilateral periventricular and subcortical region                                         | Thin corpus callosum with hypoplastic splenium, Mild prominence of lateral ventricles, Symmetric areas of restricted diffusivity in posterior pons and medulla     |
| Dysmorphisms                     | Dysplastic ears, upslanting palpebral fissures, full cheeks, micrognathia, tented mouth, and high palate. | Metopic ridge, biparietal narrowing, Dysplastic ears, full cheeks, micrognathia |                  | Broad nasal bridge, Large mouth with protruding tongue Overfolded helix, frontal lobule of ear, bilaterally | Hypertelorism, Coarse facial features, Wide protruding eyes (proptosis), Low set ears, High arched palate, Retromicrognathia, Craniosynostosis (Coronal, Sagittal, metopic) with Scaphocephaly, mildly overfold superior helixes bilaterally, low set and posteriorly rotated ears, hypoplastic nasal alae | Normal                                             | Coarse facial features, large tongue, slightly upturned earlobes | Broad nasal bridge, Long smooth philtrum, Tented upper lip, Full cheeks, Large upturned earlobes | Broad nasal bridge, Long smooth philtrum, Tented upper lip, Full cheeks, Large upturned earlobes | Low-set, posteriorly rotated ears, Wide nasal bridge Bulbous tip, Retrognathia | Coarse facial features, Hypertelorism, Long palpebral fissures, Epicanthus inversus, Broad eyebrows, Broad nose, Short columella, Long philtrum, Short chin., Coarse, large earlobes, Overfolded helix. | NA                                                                                                                                                                                                                    | Facial hypertrichosis, Coarse facies, Long smooth philtrum, Prominent nasal tip, Pointed chin with horizontal crease, Uplifted ear lobules | Facial hypertrichosis, Gum hypertrophy, Large ears with uplifted ear lobules, Small neck, Coarse facies, Long smooth philtrum, Pointed chin with horizontal crease |

|                                   |                                                                                        |                                                                                                          |                                                                                                                                                    |                                                                                   |                                                                                                                                                                                               |                             |                                                |                                    |                                    |                                                                                                             |                                                                                                                     |                                                                                                                    |                                                                                                                                                      |                                                                                                                                        |
|-----------------------------------|----------------------------------------------------------------------------------------|----------------------------------------------------------------------------------------------------------|----------------------------------------------------------------------------------------------------------------------------------------------------|-----------------------------------------------------------------------------------|-----------------------------------------------------------------------------------------------------------------------------------------------------------------------------------------------|-----------------------------|------------------------------------------------|------------------------------------|------------------------------------|-------------------------------------------------------------------------------------------------------------|---------------------------------------------------------------------------------------------------------------------|--------------------------------------------------------------------------------------------------------------------|------------------------------------------------------------------------------------------------------------------------------------------------------|----------------------------------------------------------------------------------------------------------------------------------------|
| Hearing                           | BAEP and OAE showed little or no response bilaterally                                  | Unilat hearing loss.                                                                                     | 50-60 db                                                                                                                                           |                                                                                   | Impaired                                                                                                                                                                                      | Normal                      | Normal                                         |                                    |                                    | TEOAE showed no response bilaterally                                                                        | NA                                                                                                                  | NA                                                                                                                 | Impaired BAEP at birth - normal                                                                                                                      | Impaired BAEP – not done                                                                                                               |
| Vision                            | At age 2 months he had a normal fundus, VEP showed a weak response, and ERG was normal | Short fixation, abnormal eye movements, and intermittent strabismus. VEP and ERG show decreased response | Impaired Bilateral, myopia gravis, diffuse retinal depigmentation and initial dystrophic changes                                                   | Impaired, Pale optic disc on fundoscopy                                           | left corneal opacity. Exposure keratopathy, corneal ulcers, increased ICP, gaze evoked nystagmus. Diffuse epitheliad effects bilaterally, poor vision. Inability to close eyelids since birth | Normal                      | Normal                                         | Impaired. Unable to fix and follow | Impaired. Unable to fix and follow | VEP showed no response bilaterally                                                                          | NA                                                                                                                  | NA                                                                                                                 | NA                                                                                                                                                   | NA                                                                                                                                     |
| Digital anomalies                 | Triphalangeal thumb, Brachytelephalangy and hypoplastic nails hands and feet           | Triphalangeal thumb, Brachytelephalangy and hypoplastic nails hands and feet                             | N                                                                                                                                                  | Transverse palmar crease                                                          | Flexion contractures of fingers, suspicion of triphalangeal thumbs, Shortening of distal phalanges with tapering fingers, Hypoplastic nails, Bilateral single palmar creases                  | N                           | Y                                              | N                                  | N                                  | Hypoplastic nails on hands and feet                                                                         | Brachydactyly, Absent nails on digit 5 of both hands and on digits 3-5 of the feet. Aberrant dermatoglyphic pattern | NA                                                                                                                 | Bilateral toes hypoplasia with hypoplastic / absent terminal phalanges, Nail hypoplasia, 5 <sup>th</sup> finger hypoplasia and absent distal phalanx | Bilateral toes hypoplasia with hypoplastic / absent terminal phalanges, 5 <sup>th</sup> finger hypoplasia and absent distal phalanx    |
| Plasma alkaline phosphatase (U/L) | NA                                                                                     | NA                                                                                                       | Normal (356 U/L, normal <1000)                                                                                                                     | NA                                                                                | Elevated                                                                                                                                                                                      | Elevated                    | Elevated (1000-1500 U/L)                       | Elevated (1000-1500 U/L)           | Elevated                           | NA                                                                                                          | NA                                                                                                                  | Elevated (1272) [normal 150 – 420]                                                                                 | Elevated (1546)                                                                                                                                      |                                                                                                                                        |
| Other clinical features           | 2-oxoglutaric aciduria                                                                 | 2-oxoglutaric aciduria                                                                                   | Born at 34 weeks, Pes equinovarus, hyperactive bladder, Severe constipation, achillotomy, Frequent respiratory infection, transient hypothyroidism | exocrine pancreatic insufficiency. Severe constipation. Pyelectasis. Hepatomegaly | Premature birth, hypoplasia of labia majora and minora, Small chest, Cardiac: ASD, PFO and aneurysm of the interatrial septum, moderate pulmonary hypertension                                |                             | Hypohydrosis, very dry, scaly skin elevated CK | Anal stenosis, polyhydramnios      | Polyhydramnios, Hydronephrosis     | Severe failure to thrive Necessitated PEG feeding tube Pulmonary hypertension, Left ventricular hypertrophy | Micropenis, Abnormal heart axis. Similarly affected cousin, also homozygous for variant.                            | NA                                                                                                                 | Born at 37 weeks. Poor suck and feeding since birth, persistent lethargy, constipation, EEG – burst suppression pattern, Rough, wrinkled skin        | Antenatal – increased nuchal fold thickness, 30 wks gestation – polyhydramnios, protuberant abdomen and upper lip Rough, wrinkled skin |
| Outcome                           | Lost to follow-up                                                                      | Died at 3.8y                                                                                             |                                                                                                                                                    | Died                                                                              | Died                                                                                                                                                                                          | Seizures decreased at age 4 | Seizures resolved at age 4 years               | Died at 6 months                   |                                    | Recurrent respiratory insufficiency and pneumonia, palliative care started at 8 months of age               | Died day 2                                                                                                          | infantile onset focal motor seizure with preserved consciousness. Similarly affected sibling passed away at age 4. | Died at 6 months                                                                                                                                     | Died at 6 months                                                                                                                       |

TEOAE : Transiently Evoked otoacoustic Emission, BAEP: brainstem auditory evoked potentials, VEP: Visual evoked potentials, ERG: Electroretinogram

**Table S2. Common symptoms between IGDs and DOORS syndrome**

| Syndrome name                                    | IGD          |      |      |      |      |      |      |      |      |              |       |       |          | DOORS   |
|--------------------------------------------------|--------------|------|------|------|------|------|------|------|------|--------------|-------|-------|----------|---------|
| Mutated gene                                     | PIGA,C,P,H,Q | PIGL | PIGW | PIGM | PIGV | PIGN | PIGB | PIGO | PIGG | PIGT,S,GPAA1 | PGAP1 | PGAP2 | PGAP3    | TBC1D24 |
| Deafness                                         | Y            | Y    | NR   | NR   | Y    | Y    | Y    | Y    | NR   | Y            | NR    | Y     | NR       | Y       |
| Nail anomalies                                   | Y            | NR   | NR   | NR   | Y    | Y    | Y    | Y    | NR   | Y            | NR    | Y     | NR       | Y       |
| Short fingers or hands                           | Y            | Y    | NR   | NR   | Y    | Y    | Y    | Y    | NR   | Y            | NR    | Y     | NR       | Y       |
| DD/ID                                            | Y            | Y    | Y    | Y    | Y    | Y    | Y    | Y    | Y    | Y            | Y     | Y     | Y        | Y       |
| Seizures                                         | Y            | Y    | Y    | Y    | Y    | Y    | Y    | Y    | Y    | Y            | Y     | Y     | Y        | Y       |
| MRI anomalies                                    | Y            | Y    | Y    | NR   | Y    | Y    | Y    | Y    | Y    | Y            | Y     | Y     | Y        | Y       |
| Craniosynostosis                                 | Y            | NR   | NR   | NR   | NR   | NR   | N    | Y    | NR   | Y            | NR    | NR    | NR       | Y       |
| Cranial shape anomalies                          | Y            | Y    | NR   | NR   | NR   | Y    | Y    | NR   | NR   | Y            | NR    | NR    | NR       | Y       |
| Ophthalmological anomalies                       | Y            | Y    | NR   | NR   | NR   | Y    | Y    | Y    | NR   | Y            | NR    | NR    | NR       | Y       |
| Cardiac anomalies                                | Y            | Y    | NR   | NR   | Y    | Y    | Y    | Y    | NR   | Y            | NR    | Y     | NR       | Y       |
| GU malformation                                  | Y            | Y    | NR   | NR   | Y    | Y    | N    | Y    | NR   | Y            | NR    | Y     | NR       | Y       |
| Nephrocalcinosis                                 | NR           | NR   | NR   | NR   | NR   | NR   | N    | NR   | NR   | Y            | NR    | NR    | NR       | Y       |
| Teeth anomalies                                  | Y            | Y    | NR   | NR   | NR   | NR   | N    | NR   | NR   | Y            | NR    | NR    | NR       | Y       |
| Hirschsprung disease                             | NR           | NR   | NR   | NR   | Y    | NR   | Y    | Y    | NR   | NR           | NR    | Y     | NR       | NR      |
| anal atresia                                     | Y            | NR   | NR   | NR   | Y    | NR   | Y    | Y    | NR   | NR           | NR    | Y     | NR       | NR      |
| diaphragmatic hernia                             | NR           | NR   | NR   | NR   | Y    | Y    | NR   | NR   | NR   | NR           | NR    | NR    | NR       | NR      |
| Serum alkaline phosphatase                       | mild↑        | ↑    | ↑    | NR   | ↑    | NR   | ↑    | ↑    | NR   | ↓            | NR    | ↑     | ↑        | NR      |
| 2-oxoglutaric aciduria                           | NR           | NR   | NR   | NR   | NR   | NR   | ↑    | NR   | NR   | NR           | NR    | NR    | NR       | ↑       |
| Decreased expression of CD16 on the granulocytes | Y            | Y    | Y    | Y    | Y    | Y    | Y    | Y    | N    | Y            | N     | Y     | slightly | N       |

IGDs with orange color fit diagnostic criteria of DOORS syndrome

## Supplemental Materials and Methods

### Whole exome sequencing (WES)

For individual 1a, exome sequencing and analysis was performed as described<sup>1</sup>. For individuals 2a and 3, clinical WES was performed at Baylor Genetics as described previously<sup>2</sup>. For individual 4, WES using the DNA derived from the blood leukocytes of the proband was carried out as described previously<sup>3</sup>. In brief, genomic DNA was captured using the SureSelect Human All Exon V5 kit (Agilent Technologies, Santa Clara, CA, USA) and sequenced on a Illumina HiSeq2500 (Illumina, San Diego, CA, USA) with 101-bp paired-end reads. Image analysis and base calling were performed using sequence control software with real-time analysis and CASAVA software (Illumina). Reads were aligned to GRCh37 using Novoalign (<http://www.novocraft.com/>). Marking PCR duplicates, indel realignment, and base-quality-score recalibration were performed using Picard (<http://picard.sourceforge.net/>) and Genome Analysis ToolKit (GATK) (<https://www.broadinstitute.org/gatk/index.php>). Variants were called by the GATK UnifiedGenotyper (<http://www.broadinstitute.org/gatk/>) and annotated using ANNOVAR (<http://www.openbioinformatics.org/annovar/>) after excluding the common variants registered in the dbSNP135 database (minor allele frequency $\geq$ 0.01). Detected variants were confirmed by Sanger sequencing. For individual 5, exome was performed as described previously<sup>4</sup>. For individual 6, exome was performed as described previously<sup>5</sup>. As for WES for individual 7, SureSelect Human All Exon V6 Kit was used, sequenced on an Illumina HiSeq4000 with 2x75bp PE reads. Basecalling and variant annotation were performed on the Cologne Center for Genomics in-house varbank pipeline on the GRCh37 reference genome. For individual 8a, exome was performed as previously described<sup>6</sup>. For individual 9b, exome was performed as described previously<sup>7</sup>. For individual 10b, whole genome sequencing was performed at Centogene on HiSeqX platform (Illumina, San Diego, CA, USA) with an average coverage of ~30x and a read length of 150 base pair paired-end reads. Fastq reads were aligned

against GRCh 37 human genome assembly using BWA aligner (<http://bio-bwa.sourceforge.net/>). Next, PICARD tool set was used to remove PCR duplicates and Genome analysis Toolkit (GATK) (<https://software.broadinstitute.org/gatk/>) was applied for base quality score recalibration. Variants were called using GATK HaplotypeCaller and annotation was performed using ANNOVAR (<http://www.openbioinformatics.org/annovar/>). Variants with Minor allele frequency (MAF)  $\geq 1\%$  in gnomAD database were considered. In addition, family history and clinical indications were put together to identify causative variants.

## References

1. Campeau, P.M., Kasperaviciute, D., Lu, J.T., Burrage, L.C., Kim, C., Hori, M., Powell, B.R., Stewart, F., Felix, T.M., van den Ende, J., et al. (2014). The genetic basis of DOORS syndrome: an exome-sequencing study. *Lancet Neurol* 13, 44-58.
2. Yang, Y., Muzny, D.M., Reid, J.G., Bainbridge, M.N., Willis, A., Ward, P.A., Braxton, A., Beuten, J., Xia, F., Niu, Z., et al. (2013). Clinical whole-exome sequencing for the diagnosis of mendelian disorders. *N Engl J Med* 369, 1502-1511.
3. Miyatake, S., Koshimizu, E., Fujita, A., Fukai, R., Imagawa, E., Ohba, C., Kuki, I., Nukui, M., Araki, A., Makita, Y., et al. (2015). Detecting copy-number variations in whole-exome sequencing data using the eXome Hidden Markov Model: an 'exome-first' approach. *J Hum Genet* 60, 175-182.
4. Koch, J., Freisinger, P., Feichtinger, R.G., Zimmermann, F.A., Rauscher, C., Wagentristl, H.P., Konstantopoulou, V., Seidl, R., Haack, T.B., Prokisch, H., et al. (2015). Mutations in TTC19: expanding the molecular, clinical and biochemical phenotype. *Orphanet journal of rare diseases* 10, 40.



5. Low, K.J., Baptista, J., Babiker, M., Caswell, R., King, C., Ellard, S., and Scurr, I. (2019). Hemizygous UBA5 missense mutation unmasks recessive disorder in a patient with infantile-onset encephalopathy, acquired microcephaly, small cerebellum, movement disorder and severe neurodevelopmental delay. *European journal of medical genetics* 62, 97-102.
6. van den Bogaard, E.H.J., van Geel, M., van Vlijmen-Willems, I., Jansen, P.A.M., Peppelman, M., van Erp, P.E.J., Atalay, S., Venselaar, H., Simon, M.E.H., Joosten, M., et al. (2018). Deficiency of the human cysteine protease inhibitor cystatin M/E causes hypotrichosis and dry skin. *Genetics in medicine: official journal of the American College of Medical Genetics*.
7. Monies, D., Abouelhoda, M., AlSayed, M., Alhassnan, Z., Alotaibi, M., Kayyali, H., Al-Owain, M., Shah, A., Rahbeeni, Z., Al-Muhaizea, M.A., et al. (2017). The landscape of genetic diseases in Saudi Arabia based on the first 1000 diagnostic panels and exomes. *Hum Genet* 136, 921-939.
