# Supplementary material
Source: PubMed Central journal article supplement (PMC6698938)
Supplement: mmc2.pdf [file mmc2.pdf]

# Mutations in *PIGB* Cause an Inherited GPI Biosynthesis Defect with an Axonal Neuropathy and Metabolic Abnormality in Severe Cases

Yoshiko Murakami,<sup>1,27</sup> Thi Tuyet Mai Nguyen,<sup>2,27</sup> Nissan Baratang,<sup>2</sup> Praveen K. Raju,<sup>2</sup> Alexej Knaus,<sup>3</sup> Sian Ellard,<sup>4</sup> Gabriela Jones,<sup>5</sup> Baiba Lace,<sup>6</sup> Justine Rousseau,<sup>2</sup> Norbert Fonya Ajeawung,<sup>2</sup> Atsushi Kamei,<sup>7</sup> Gaku Minase,<sup>8</sup> Manami Akasaka,<sup>7</sup> Nami Araya,<sup>7</sup> Eriko Koshimizu,<sup>8</sup> Jenneke van den Ende,<sup>9</sup> Florian Erger,<sup>10</sup> Janine Altmüller,<sup>11</sup> Zita Krumina,<sup>12</sup> Jurgis Strautmanis,<sup>13</sup> Inna Inashkina,<sup>14</sup> Janis Stavusis,<sup>14</sup> Areeg El-Gharbawy,<sup>15</sup> Jessica Sebastian,<sup>15</sup> Ratna Dua Puri,<sup>16</sup> Samarth Kulshrestha,<sup>16</sup> Ishwar C. Verma,<sup>16</sup> Esther M. Maier,<sup>17</sup> Tobias B. Haack,<sup>18,19</sup> Anil Israni,<sup>20</sup> Julia Baptista,<sup>4</sup> Adam Gunning,<sup>4</sup> Jill A. Rosenfeld,<sup>21</sup> Pengfei Liu,<sup>21</sup> Marieke Joosten,<sup>22</sup> María Eugenia Rocha,<sup>23</sup> Mais O. Hashem,<sup>24</sup> Hesham M. Aldhalaan,<sup>24</sup> Fowzan S. Alkuraya,<sup>24</sup> Satoko Miyatake,<sup>8</sup> Naomichi Matsumoto,<sup>8</sup> Peter M. Krawitz,<sup>3</sup> Elsa Rossignol,<sup>2,24,25</sup> Taroh Kinoshita,<sup>1,\*</sup> and Philippe M. Campeau<sup>2,26,\*</sup>

Proteins anchored to the cell surface via glycosylphosphatidylinositol (GPI) play various key roles in the human body, particularly in development and neurogenesis. As such, many developmental disorders are caused by mutations in genes involved in the GPI biosynthesis and remodeling pathway. We describe ten unrelated families with bi-allelic mutations in *PIGB*, a gene that encodes phosphatidylinositol glycan class B, which transfers the third mannose to the GPI. Ten different *PIGB* variants were found in these individuals. Flow cytometric analysis of blood cells and fibroblasts from the affected individuals showed decreased cell surface presence of GPI-anchored proteins. Most of the affected individuals have global developmental and/or intellectual delay, all had seizures, two had polymicrogyria, and four had a peripheral neuropathy. Eight children passed away before four years old. Two of them had a clinical diagnosis of DOORS syndrome (deafness, onychodystrophy, osteodystrophy, mental retardation, and seizures), a condition that includes sensorineural deafness, shortened terminal phalanges with small finger and toenails, intellectual disability, and seizures; this condition overlaps with the severe phenotypes associated with inherited GPI deficiency. Most individuals tested showed elevated alkaline phosphatase, which is a characteristic of the inherited GPI deficiency but not DOORS syndrome. It is notable that two severely affected individuals showed 2-oxoglutaric aciduria, which can be seen in DOORS syndrome, suggesting that severe cases of inherited GPI deficiency and DOORS syndrome might share some molecular pathway disruptions.

## Introduction

Inherited glycosylphosphatidylinositol (GPI) deficiencies (IGDs) are a group of disorders found in individuals with mutations in the genes encoding proteins participating in GPI biosynthesis and modification. More than 30 proteins that are phosphatidylinositol glycan anchor biosynthesis (PIG) proteins and post-GPI-attachment-to-proteins

(PGAP) proteins are involved in this process.<sup>1</sup> GPI-anchored proteins (GPI-APs) play a variety of roles in the cell as hydrolytic enzymes, adhesion molecules, receptors, protease inhibitors, and complement regulatory proteins.<sup>2</sup> To date, many variants in genes involved in the GPI-synthesis pathway have been linked to IGDs, and some of them are also referred to as GPIBDs (GPI biosynthesis defects [MIM: 618010]), Mabry syndrome, CHIME syndrome (coloboma,

<sup>1</sup>Yabumoto Department of Intractable Disease Research, Research Institute for Microbial Diseases, Osaka University, Suita, Osaka 565-0871, Japan; <sup>2</sup>Centre Hospitalier Universitaire Sainte-Justine Research Center, Montreal, QC H3T 1C5, Canada; <sup>3</sup>Institute for Genomic Statistics and Bioinformatics, University Hospital Bonn, 53127 Bonn, Germany; <sup>4</sup>Royal Devon and Exeter NHS Foundation Trust, Exeter EX2 5DW, UK; <sup>5</sup>Clinical Genetics Department, Nottingham University Hospitals NHS Trust, Nottingham NG5 1PB, UK; <sup>6</sup>Centre Hospitalier Universitaire de Québec, 2705 Boulevard Laurier, Ville de Québec, QC G1V 4G2, Canada; <sup>7</sup>Department of Pediatrics, School of Medicine, Iwate Medical University, Morioka, Iwate 020-8505, Japan; <sup>8</sup>Department of Human Genetics, Yokohama City University Graduate School of Medicine, Yokohama, Kanagawa 236-0004, Japan; <sup>9</sup>Centrum Medische Genetica Antwerpen, 2650 EDEGEM, Belgium; <sup>10</sup>Institute of Human Genetics, University Hospital of Cologne, and Center for Molecular Medicine, University of Cologne, 50931 Cologne, Germany; <sup>11</sup>Cologne Center for Genomics, University of Cologne, 50931 Cologne, Germany; <sup>12</sup>Department of Biology and Microbiology, Riga Stradiņš University, Riga, LV-1029, Latvia; <sup>13</sup>Children's Clinical University Hospital, Riga, LV-1004, Latvia; <sup>14</sup>Latvian Biomedical Research and Study Centre, Ratsupites Str. 1 k-1, Riga LV-1067, Latvia; <sup>15</sup>Department of Medical Genetics, Children's Hospital of Pittsburgh of University Pittsburgh Medical Center, Pittsburgh, PA 15224, USA; <sup>16</sup>Institute of Medical Genetics and Genomics, Sir Ganga Ram Hospital, New Delhi 110060, India; <sup>17</sup>Department of Inborn Errors of Metabolism, Dr. von Hauner Children's Hospital, 80337 Munich, Germany; <sup>18</sup>Institute of Medical Genetics and Applied Genomics, University of Tübingen, 72074 Tübingen, Germany; <sup>19</sup>Institute of Human Genetics, Technische Universität München, 81675 Munich, Germany; <sup>20</sup>Department of Paediatric Neurology, Leicester Royal Infirmary, Leicester LE1 5WW, UK; <sup>21</sup>Department of Molecular and Human Genetics, Baylor College of Medicine, Houston, TX 77030, USA; <sup>22</sup>Dept of Clinical Genetics, Erasmus MC, PO Box 2040, 3000 CA Rotterdam, the Netherlands; <sup>23</sup>CENTOGENE AG, The Rare Disease Company, 18055 Rostock, Germany; <sup>24</sup>Department of Genetics, King Faisal Specialist Hospital and Research Center, Riyadh 11211, Saudi Arabia; <sup>25</sup>Department of Neurosciences, Centre Hospitalier Universitaire Sainte-Justine and University of Montreal, Montreal, QC H3T 1C5, Canada; <sup>26</sup>Department of Pediatrics, Centre Hospitalier Universitaire Sainte-Justine and University of Montreal, Montreal, QC H3T 1C5, Canada

<sup>27</sup>These authors contributed equally to this work.

\*Correspondence: [p.campeau@umontreal.ca](mailto:p.campeau@umontreal.ca) (P.M.C.), [tkinoshi@biken.osaka-u.ac.jp](mailto:tkinoshi@biken.osaka-u.ac.jp) (T.K.)

<https://doi.org/10.1016/j.ajhg.2019.05.019>

© 2019 American Society of Human Genetics.

congenital heart disease, ichthyosiform dermatosis, mental retardation, and ear anomalies [MIM: 280000]), HPMRSs (hyperphosphatasia mental retardation syndromes [MIM: PS239300]), and MCAHSs (multiple congenital anomalies-hypotonia-seizures syndromes [MIM: PS614080]).<sup>3,4</sup> The main clinical features of IGDs include global developmental delay, intellectual disability, seizures, hypotonia, and facial dysmorphisms. Various organ anomalies such as Hirschsprung disease and renal hypoplasia can also be found in severe cases of IGDs. They also show deafness, hypoplastic nails, and brachytelephalangy, in addition to intellectual disability and seizures, all of which interestingly overlap with DOORS (deafness, onychodystrophy, osteodystrophy, mental retardation, and seizures [MIM: 220500]) syndrome, which is not considered an IGD and is most often caused by mutations in *TBC1D24* [MIM: 613577] (Table S2). Here, we present a cohort of individuals from ten unrelated families with *PIGB* deficiency. The human *PIGB* [MIM: 604122], first isolated by Takahashi et al. in 1996,<sup>5</sup> encodes an endoplasmic reticulum transmembrane protein that is made of 554 amino acids and transfers the third mannose to the GPI precursor.

## Material and Methods

### Samples from the Affected Individuals

The experimental procedures were approved by the institutional review boards of Osaka University, Iwate Medical University, and Yokohama City University in Japan, as well as the Centre Hospitalier Universitaire (CHU) Sainte-Justine Research Center. The samples were obtained with written informed consent by the parents.

### Fluorescence-Activated Cell Sorting Analysis

The GPI-AP surface levels of granulocytes from individuals 4 and 7 or Chinese hamster ovary (CHO) cells were determined by staining cells with Alexa488-conjugated inactivated aerolysin (FLAER; Protox Biotech) and mouse anti-human CD59 (5H8), -human DAF (IA10), -human CD24 (ML5), -hamster-urokinase plasminogen activator receptor (uPAR) (5D6), and -human CD16 (3G8) monoclonal antibodies; then the cells were stained by a PE-conjugated anti-mouse IgG antibody and analyzed by flow cytometer (MACSQuant Analyzer 10, Miltenyi Biotec) with Flowjo software (v9.5.3, Tommy Digital).

Blood samples from individuals 2A and 5 were stained with FLAER-Alexa 448 (Cedarlane), PE-conjugated anti-human CD16 (BioLegend), and FITC-conjugated mouse anti-human CD55 or CD59 (BD PharMingen) for 1 h on ice in incubation buffer containing 0.5% BSA. Red blood cells were lysed in fluorescence-activated cell sorting (FACS) Lysing Solution (BD Bioscience), and the granulocytes' GPI-AP levels were analyzed by Cytobank software.

For the fibroblasts of individuals 2A and 6B, cells were harvested at 80%–90% confluency then stained with FLAER-Alexa 448, FITC-conjugated mouse anti-human CD73, or PE-conjugated mouse anti-human CD109 (BioLegend) for 1 h on ice in the incubation buffer; then the cells were fixed in 3.7% formaldehyde. Non-specific binding was washed off before the cells were analyzed by a BD FACSCanto II system (BD Biosciences) and then analyzed by Cytobank software.

## Whole-Exome Sequencing

For all the affected individuals, exome sequencing and analysis was performed, and this is described in detail in the [Supplemental Material and Methods](#).

## RNA Analysis

Total RNA was extracted with the QIAamp RNA Blood Mini Kit (QIAGEN) from the blood leukocytes of the proband (individual 6B), the mother, and a normal control. Total RNA was then reverse-transcribed with SuperScript III First-Strand Synthesis System (Thermo Fisher Scientific) with random hexamers. Polymerase chain reaction (PCR) was performed with forward and reverse primers on exons 6 and 10 of *PIGB*, and the amplicon was subjected to Sanger sequencing. PCR conditions and primer sequences are available upon request.

## Functional Analysis

HA-tagged human *PIGB* cDNA and its mutant, generated by site-directed mutagenesis, were subcloned into SR $\alpha$  (strong promoter)-driven pME vector, thymidine-kinase-promoter-driven pTK vector, or TATA-box-only pTA vector. Plasmids were transfected by electroporation into *PIGB*-deficient CHO cells (constitutively expressed human CD59 and DAF) with the luciferase-expressing construct to monitor the transfection efficiency. The levels of GPI-APs were analyzed by FACS, staining cells with anti-CD59 and anti-DAF, anti-uPAR antibody, and FLAER. The levels of *PIGB* in cells were determined by immunoblotting with anti-HA antibody (MBL) and normalized with luciferase activities for transfection efficiency and with band intensities of glyceraldehyde 3-phosphate dehydrogenase (GAPDH) for the loading controls.

## Rescue Assays of GPI-APs on the Fibroblasts from the Affected Individual 6B

Fibroblasts from the affected individual 6B were transduced with an empty-LX304 lentivirus or a wild-type (WT) *PIGB*-LX304 and selected by Blasticidin resistance. FACS analysis was performed as described above for fibroblasts with these transduced cells, which were compared with nontransduced cells, as well as healthy control cells.

## Results

### Clinical Information and Genetic Analysis of the Affected Individuals

The initial family was identified as part of a pair of studies on DOORS syndrome (initially a candidate gene study looking notably at 2-oxoglutarate dehydrogenase, and then an exome study in which they were family number 12).<sup>6,7</sup> The probands were noted to have two mutations in *PIGB* (GenBank: NM\_004855.4; c.212G>A [p.Arg71Gln] and c.1162G>C [p.Ala388Pro]). The affected children had triphalangeal thumb, brachytelephalangy, and hypoplastic fingernails and toenails, in addition to seizures, developmental delay, and deafness (see [Figure 1](#) and [Table 1](#) for pedigrees, images, and variants for all affected families). They also showed 2-oxoglutaric aciduria (211 and 195  $\mu\text{mol}/\text{mmol}$  creatinine. Reference value [RV] <9  $\mu\text{mol}/\text{mmol}$  creatinine). Families 2 and 3 were

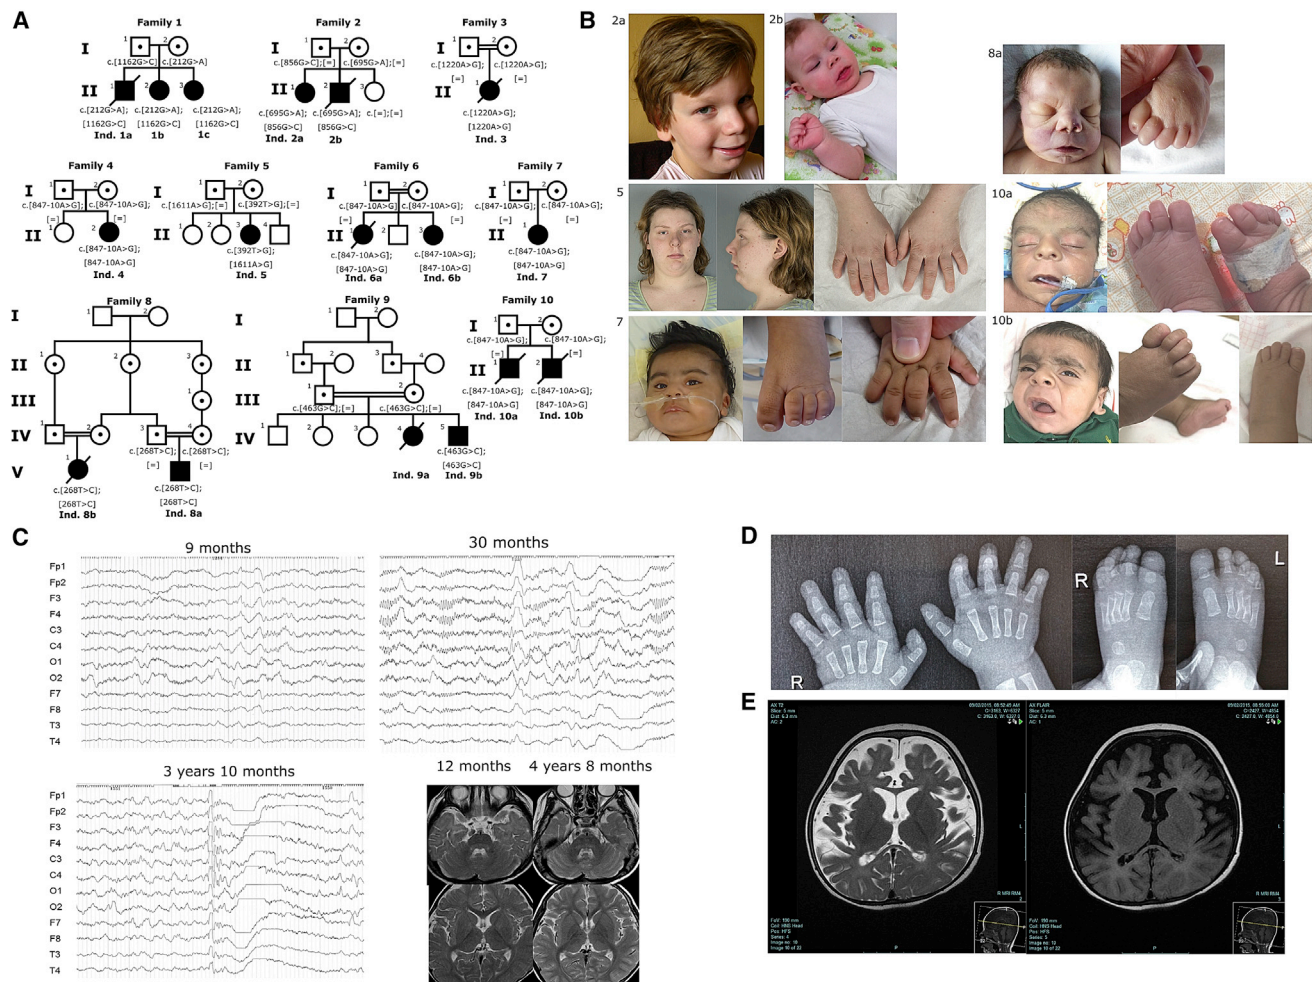

### Figure 1. Phenotypes of Affected Individuals

(A) The pedigrees of families with *PIGB* mutations. In family 5, the unaffected siblings were genotyped, and none were compound heterozygous. However, the family does not wish their carrier status to be published.

(B) Photographs of affected individuals. Individual 2A at 9 years old (note a wide nasal bridge, a long and smooth philtrum, a thin upper lip, a horizontal chin crease, and upturned earlobes), 2B at 11 months old (note similar features), individual 5 at 20 years old (note a horizontal chin crease, a prominent philtrum, and slightly upturned earlobes), individual 7 at 8 months old (note a wide nasal bridge, brachytelephalangy, and nail hypoplasia), individual 8A at birth (note a wide nasal bridge, a long and smooth philtrum, and a thin upper lip), individual 10A at birth, and individual 10B at 2.5 months old (note for both hypertrichosis, a wide nasal bridge, coarse facial features, a long and smooth philtrum, a pointed chin with a horizontal crease, uplifted earlobes, and toe and nail hypoplasia).

(C) EEG findings for individual 4. The top left panel depicts a sleep EEG at 9 months old, before any treatment; diffuse, low-voltage fast waves seem to be characteristic in this individual. Spindle waves are observed. High-amplitude slow waves are sometimes seen at the frontal regions predominantly. The top right panel depicts a sleep EEG at 30 months old; there are 0.5 s 12 Hz rhythmic waves at the frontal region and very small spike and high-voltage slow wave complexes. There is also a paucity of sleep markers and bilateral central spikes. The bottom left panel depicts a sleep EEG at 3 years and 10 months old. Generalized spike and wave discharge followed by voltage attenuation were seen. In the bottom right pictures, brain MRI did not demonstrate any brain anomalies such as dysplasia, atrophy, or delayed myelination.

(D) Radiographs of the hands and feet of individual 10B at 2.5 months of age showing aplasia of the terminal phalange of the fifth finger bilaterally and hypoplasia or aplasia of the terminal phalanges of the toes.

(E) MRI of individual 9A at 2 years and 3 months old. The left image depicts an axial T-2 sequence showing diffuse cerebral volume loss characterized by widening of the ventricles and extra CSF spaces with a prominent interhemispheric fissure anteriorly. There is suspicion of polymicrogyria along the bilateral occipital lobes, more pronounced on the right. The right image depicts an axial FLAIR sequence showing diffuse cerebral volume loss. There were signs of hypomyelination with a hyperintense signal in peri-ventricular and subcortical white matter, more pronounced at the occipital and frontal lobes bilaterally.

identified by a search for *PIGB* variants in affected individuals who had clinical exomes performed at Baylor Genetics diagnostic laboratory (searching for overlapping clinical features and bi-allelic *PIGB* variants). Compound-heterozygous mutations c.695G>A (p.Arg232His) and

c.856G>C (p.Val286Leu) were found in family 2, and the affected child in family 3 is homozygous for mutation c.1220A>G (p.His407Arg). In family 4, the affected individual, who is from Japanese non-consanguineous parents, was found through an IGD screening of CD16 cell

**Table 1. Mutations Identified**

| Family | Genomic Variant (hg19) | mRNA Variant (GenBank: NM_004855.4) | Protein Variant             | ExAC Minor Allele Frequency | gnomAD Minor Allele Frequency |
|--------|------------------------|-------------------------------------|-----------------------------|-----------------------------|-------------------------------|
| 1      | chr15:g.55612521G>A    | c.212G>A                            | p.Arg71Gln                  | $1.682 \times 10^{-5}$      | $1.07 \times 10^{-5}$         |
|        | chr15:g.55642935G>C    | c.1162G>C                           | p.Ala388Pro                 | Not found                   | Not found                     |
| 2      | chr15:g.55626106G>A    | c.695G>A                            | p.Arg232His                 | $5.174 \times 10^{-5}$      | $4.52 \times 10^{-5}$         |
|        | chr15:g.55632819G>C    | c.856G>C                            | p.Val286Leu                 | Not found                   | Not found                     |
| 3      | chr15:g.55642993A>G    | c.1220A>G                           | p.His407Arg                 | Not found                   | Not found                     |
| 4      | chr15:g.55632800A>G    | c.847-10A>G                         | p.Gln282_Trp283insArgCysGln | 0.0001592                   | $6.51 \times 10^{-5}$         |
| 5      | chr15:g.55613563T>G    | c.392T>G                            | p.Leu131*                   | Not found                   | $4.29 \times 10^{-6}$         |
|        | chr15:g.55647576A>G    | c.1611A>G                           | p.Ile537Met                 | Not found                   | Not found                     |
| 6      | chr15:g.55632800A>G    | c.847-10A>G                         | p.Gln282_Trp283insArgCysGln | 0.0001592                   | $6.51 \times 10^{-5}$         |
| 7      | chr15:g.55632800A>G    | c.847-10A>G                         | p.Gln282_Trp283insArgCysGln | 0.0001592                   | $6.51 \times 10^{-5}$         |
| 8      | chr15:55612577T>C      | c.268T>C                            | p.Ser90Pro                  | Not found                   | Not found                     |
| 9      | chr15:55619774G>C      | c.463G>C                            | p.Asp155His                 | $1.684 \times 10^{-5}$      | $1.43 \times 10^{-5}$         |
| 10     | chr15:55632800A>G      | c.847-10A>G                         | p.Gln282_Trp283insArgCysGln | 0.0001592                   | $6.51 \times 10^{-5}$         |

surface presence on granulocytes by FACS analysis and then whole-exome sequencing. Subsequent families were matched to this study through Genematcher.<sup>8</sup> The homozygous mutation c.847-10A>G was found in families 4, 6, 7, and 10. As shown in Figure 2, the replacement of A by G introduces a new acceptor site in intron 7; this results in the inclusion of 9 nucleotides of intron 7 in the mRNA and subsequently generates a splicing variant, p.Gln282\_Trp283insArgCysGln (Figures 2C–E). The proband in family 5 has the compound-heterozygous mutations c.392T>G (p.Leu131\*) and c.1611A>G (p.Ile537Met), and the probands in families 8 and 9 were homozygous for the mutations c.268T>C (p.Ser90Pro) and c.463G>C (p.Asp155His), respectively.

All affected individuals have global development delay and/or intellectual disability (Tables 2 and S1). The individuals from families 1–3, 6, and 8–10 were severely affected, and one in each family died at early ages of complications of their epileptic encephalopathy. Neurological abnormalities including axonal degenerative polyneuropathy and demyelinating sensorimotor polyneuropathy, hearing loss, and visual impairment were observed in the severely affected individuals. All individuals suffered from seizures that started in infancy. One individual has hypertonia, spasticity, and joint contractures. On MRI, two had polymicrogyria, two had hypomyelination, three had a thin corpus callosum, and three had enlarged ventricles (Figure 1E).

Coarse facial features were noted in five individuals, ear anomalies in ten (notably upturned earlobes in seven), micrognathia in two, a tented mouth in two, full cheeks in four, a broad nasal bridge in four, shortening of distal phalanges in six, and hypoplastic nails in seven (Figures 1B and 1D).

Elevated plasma alkaline phosphatase (ALP) was noted in most tested individuals (Table S1). The fetal phenotype

of the second child of family 10 included increased nuchal thickness at 19 weeks gestation and polyhydramnios with a protuberant abdomen and upper lip noted at the 30 weeks antenatal scan.

#### Flow Cytometric Analysis of Blood Cells

The levels of cell surface GPI-AP abundance in available blood samples from the affected individuals of families 2, 4, 5, and 7 were examined by flow cytometric analysis that used various GPI-AP markers, including fluorescence-labeled aerolysin (FLAER), CD16, CD24, CD55, CD56, and CD59. The CD16 presence on the cell surface of granulocytes from individuals 2A, 4, 5, and 7 was decreased to 53%, 56%, 35%, and 25% of that from the healthy control, respectively (Figure 3). The presences of CD55 and CD59 on the cell surface of granulocytes from individual 5 were both decreased to 60%, and in individual 7, CD59 was reduced to 50% (Figure 3). Lymphoblastoid cell lines established by immortalization of the B lymphocytes showed a decrease to 55% for the FLAER signal in individual 2A and a decrease to 55% for CD55 in individual 5 compared to that in the healthy control (Figure S1).

#### Flow Cytometric Analysis of Fibroblasts

In fibroblasts established from skin biopsies of individuals 2A and 6B, we also found low GPI-AP levels. The fibroblasts from individual 2A showed decreased FLAER (35%), CD73 (54%), and CD87 (58%) compared to those from the healthy control, whereas the unaffected sibling showed normal levels of GPI-APs (Figure 4). In individual 6B, CD73 and CD109 levels were decreased to 30% and 26%, respectively, but were rescued up to 70% of the healthy control by transduction with a *PIGB*-encoding-Lx304 lentiviral vector. This suggested

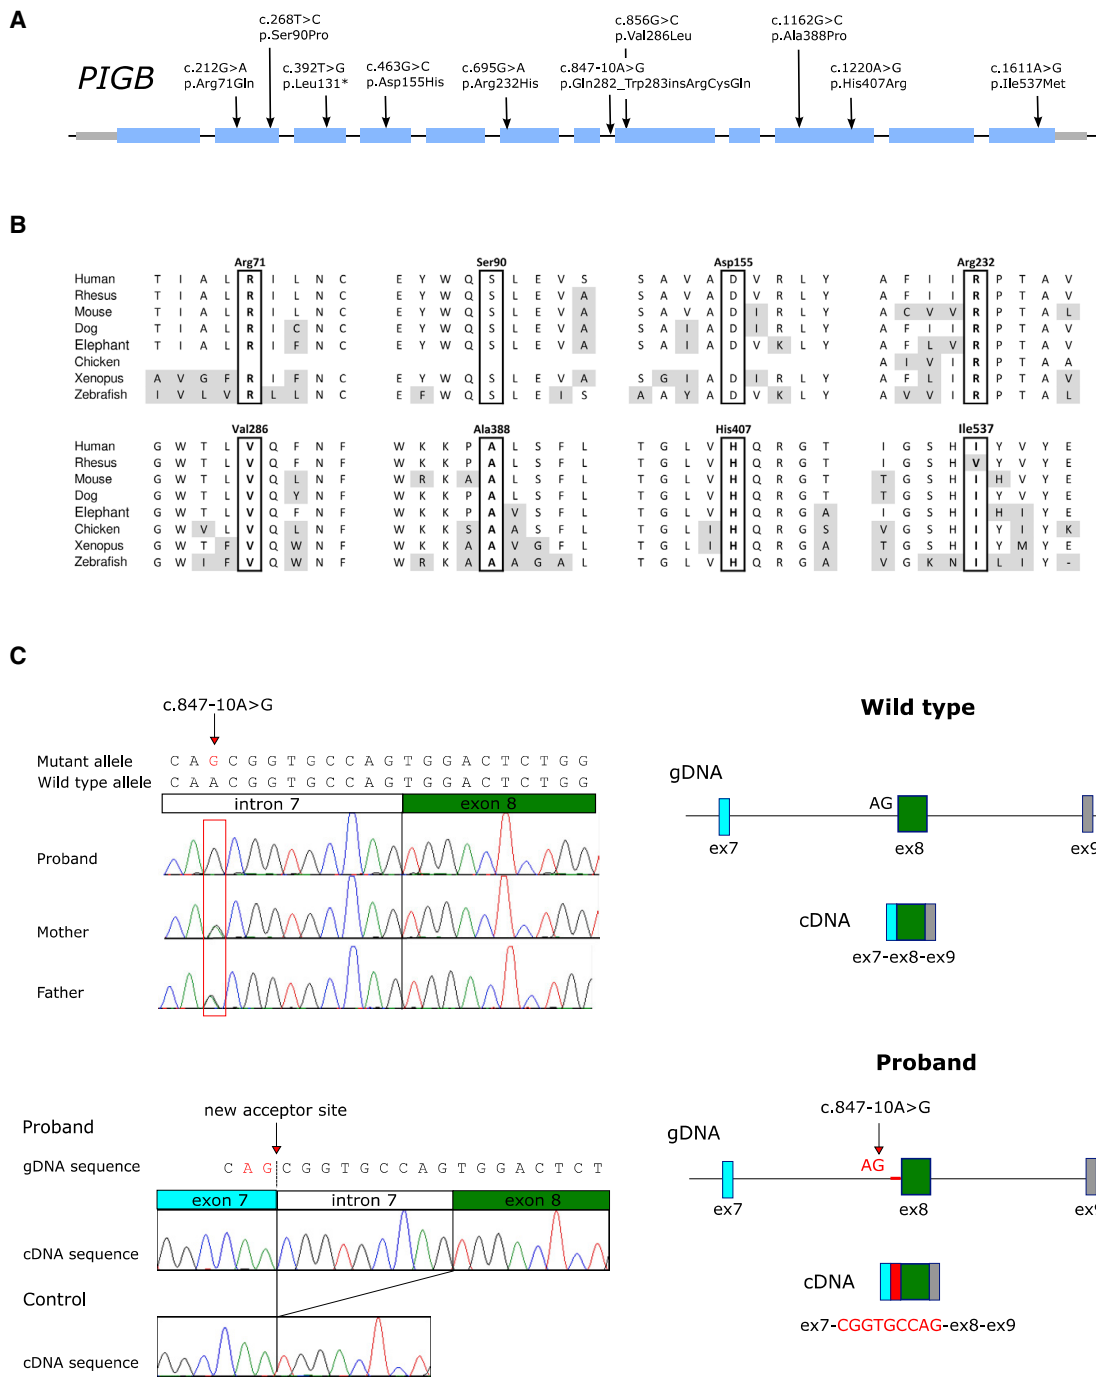

**Figure 2. PIGB Variants**

(A) *PIGB* variants found in affected individuals.

(B) Alignment of the *PIGB* sequence where missense mutations were found.

(C) Analysis of the *PIGB* splicing mutation. The upper left depicts Sanger sequencing of proband 6B and the parents that used their genomic DNA showed that the c.847-10A>G mutation was homozygous in the proband and heterozygous in both parents. The lower left depicts the cDNA analysis performed with leukocytes from the proband; the analysis showed the insertion of the last nine bases of intron 7 before the canonical exon 8 as a result of the activation of an aberrant splice acceptor site. The proband did not express wild-type mRNA, which was observed in a control. At right, a graphic description of the activation of the aberrant splice acceptor site at exon 8 in *PIGB* occurred in the proband. Abbreviations are as follows: gDNA = genomic DNA and Ex = exon.

that the mutation in *PIGB* is responsible for the reduced detection of GPI-APs on the fibroblasts from individual 6B (Figure 4).

#### Functional Studies with *PIGB*-Deficient CHO Cells

*PIGB*-deficient CHO cells<sup>9</sup> were transfected with wild-type or the various mutant *PIGB* cDNAs driven by the strong (pME)

**Table 2. Phenotypic Summary of the Affected Individuals**

| Family                              | 1  |    | 2  |    | 3 | 4 | 5  | 6  |    | 7 | 8               | 9               | 10  |     | Total |
|-------------------------------------|----|----|----|----|---|---|----|----|----|---|-----------------|-----------------|-----|-----|-------|
| Individual                          | 1A | 1B | 2A | 2B | 3 | 4 | 5  | 6A | 6B | 7 | 8A              | 9B              | 10A | 10B |       |
| DD/ID                               | +  | +  | +  | +  | + | + | +  | +  | +  | + | NA              | +               | +   | +   | 13/13 |
| Seizures                            | +  | +  | +  | +  | + | + | +  | +  | +  | + | +               | +               | +   | +   | 14/14 |
| Dysmorphic features                 | +  | +  | -  | +  | + | - | +  | +  | +  | + | +               | -               | +   | +   | 11/14 |
| Deafness                            | +  | +  | +  | -  | + | - | -  | -  | -  | + | -               | -               | +   | +   | 7/14  |
| Ophthalmological anomalies          | +  | +  | +  | +  | + | - | -  | +  | +  | + | NA              | NA              | NA  | NA  | 8/10  |
| Hand and feet anomalies             | +  | +  | -  | +  | + | - | +  | -  | -  | + | +               | -               | +   | +   | 9/14  |
| Brain MRI or CT anomalies           | +  | +  | -  | +  | + | - | -  | -  | -  | + | +               | NA              | +   | +   | 8/13  |
| Elevated serum alkaline phosphatase | NA | NA | -  | NA | + | + | +  | +  | +  | + | NA              | NA              | +   | +   | 8/9   |
| 2-oxoglutaric aciduria              | +  | +  | NA | -  | - | - | NA | -  | NA | - | NA <sup>a</sup> | NA <sup>a</sup> | NA  | -   | 2/8   |

Thorough clinical details are not available for individuals 1C, 8B, and 9A. NA = details not available.

<sup>a</sup>Urine organic acids were normal in the other affected relative shown in Figure 1.

promoter. FACS analysis for the presence of GPI-APs, such as CD59, CD55, and CD87 (uPAR), at the cell surface and immunoblotting were performed three days later (Figure 5). *PIGB* cDNA bearing the p.Ala388Pro variant only slightly restored the surface presence of GPI-APs compared to wild-type cDNA (15% of wild type), and *PIGB* cDNA with the p.Arg71Gln variant showed null activity even with the strong-promoter-driven constructs. These data suggested that both variants found in Family 1 greatly reduced *PIGB* activity, leading to clinical severity. The levels of the p.Arg71Gln variant were severely decreased; the p.Ala388Pro variant also decreased to 50% of the wild-type *PIGB* (Figure 5B). Of the variants found in family 2, p.Val286Leu only partially restored GPI-APs (28% of wild type), and p.Arg232His showed almost null activity, suggesting again greatly reduced *PIGB* activity. The variant protein level was slightly reduced for p.Val286Leu. The variant found in family 3, p.His407Arg, partially restored the surface levels of GPI-APs (48% of wild type), and its protein level was reduced to 70%. The splicing variant p.Gln282\_Trp283insArg-CysGln, found in families 4, 6, 7, and 10, partially restored the surface levels of GPI-APs (43% of wild type), and the protein level was severely reduced, suggesting that the variant protein is unstable and the actual *PIGB* activity in the affected individuals might be more severely decreased. The p.Ile537Met and p.Leu131\* variants found in family 5 showed divergent results: p.Leu131\* showed partial restoration (40% of wildtype), whereas the p.Ile537Met variant restored GPI-APs more efficiently than the wild type, presumably because of elevated protein levels. Note that the transcript encoding p.Leu131\* most likely undergoes nonsense-mediated decay (NMD) *in vivo*; in these experiments, however, the cDNA does not have introns, and thus there is no NMD. When the p.Ile537Met mutant was produced by constructs driven by weaker promoters (pTK and pTA), slightly decreased activities were detected, suggesting that mild reduction of *PIGB* activity leads to a mild phenotype (as seen in individual 5; Figure S2).

## Discussion

IGDs show clinical heterogeneity and overlap with various other syndromes and diseases. For example, Mabry syndrome, also known as hyperphosphatasia with mental retardation syndrome, is now known to be an IGD. Some individuals with Fryns syndrome (MIM: 229850), characterized by diaphragmatic hernia, gastrointestinal and genitourinary malformations, coarse facies, and distal digital hypoplasia, also have pathogenic *PIGN* (MIM: 606097) or *PIGV* (MIM: 610274) mutations. CHIME syndrome, characterized by colobomas, heart defects, ichthyosiform dermatosis, intellectual disability, and either ear defects or epilepsy is also an IGD. Toriello-Carey syndrome is also caused by *PGAP3* mutations<sup>10,11</sup> (MIM: 611801). These syndromes were initially defined by a combination of characteristic symptoms, and GPI pathway genes were subsequently implicated by genetic analyses.

FACS analysis is useful for the screening of IGDs. There are more than 150 different GPI-APs, and each precursor protein has a GPI attachment signal (20~30 hydrophobic amino acids) at the C terminus. The GPI attachment signals in different proteins have different signal strengths. When the production of GPI is limited by the mutations, those precursor proteins that have strong GPI attachment signals are preferentially modified by GPI. Thus, the degree of decrease differs among the various GPI-APs. Taking into consideration that different kinds of cells express different kinds of GPI-APs, we applied the most sensitive markers known to examine the pathogenicity of the mutations.

In this report, we describe an IGD: *PIGB* deficiency. Levels of various GPI-APs on granulocytes and fibroblasts were decreased in the affected individuals; however, the degree of decrease was not correlated with the clinical severity. On the basis of functional analysis that used *PIGB*-deficient CHO cells, the residual activities of the mutant *PIGB* from the families are in a rank order from high to

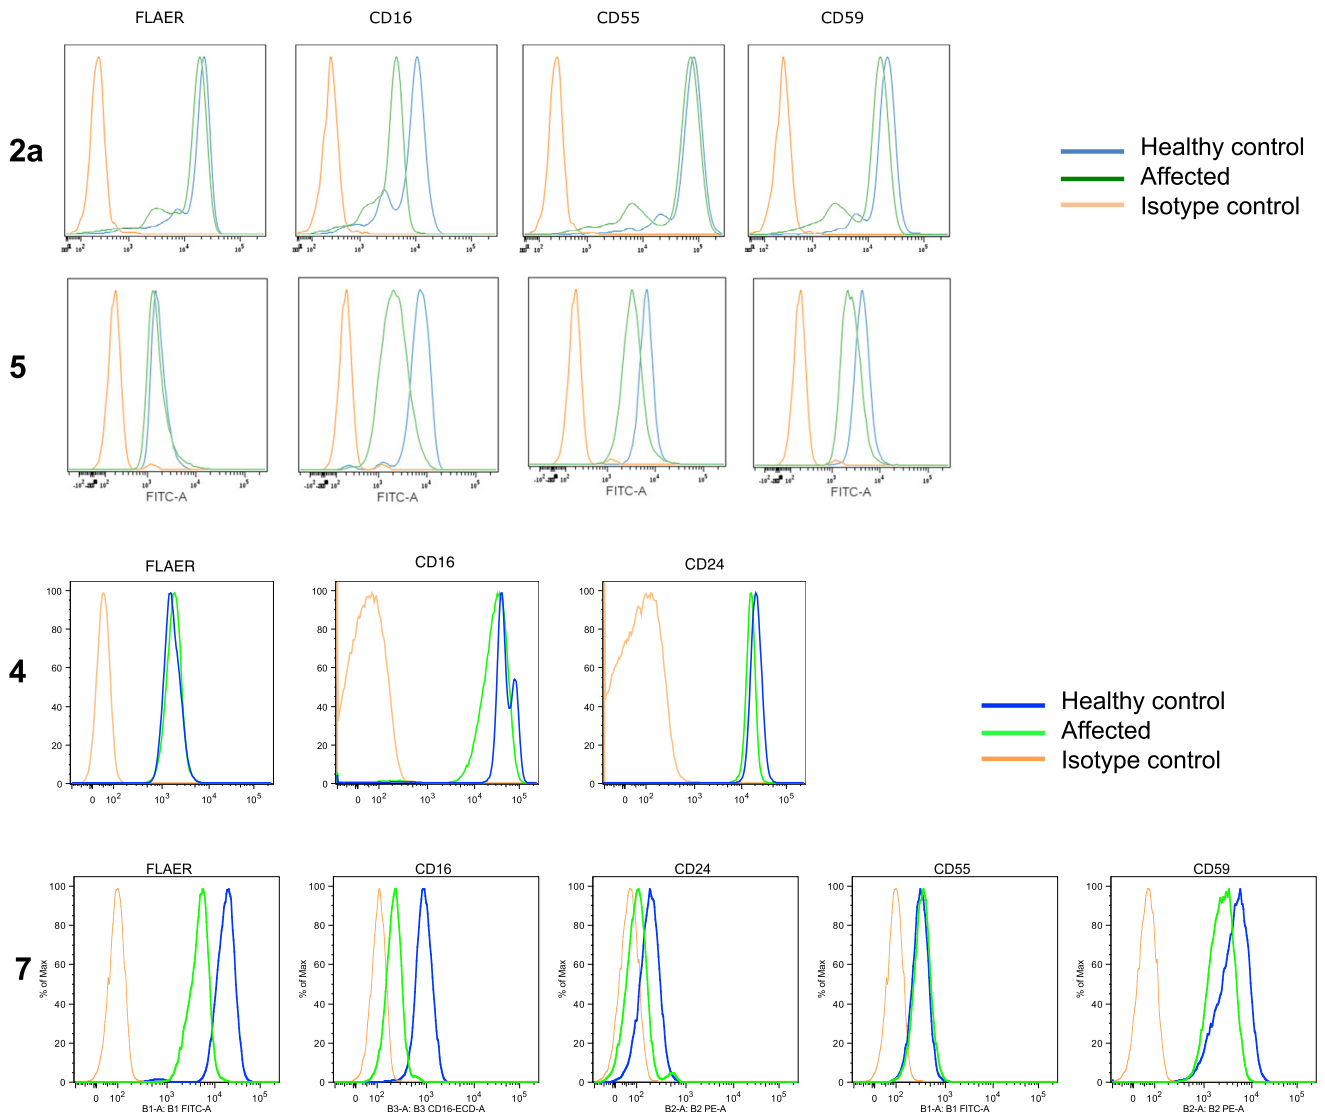

**Figure 3. Flow Cytometry Analysis of Cell Surface GPI-APs of Granulocytes**

Blood samples collected from affected individuals and controls were stained with FLAER and antibodies against GPI-APs (CD16, CD24, CD55, and CD59) and were analyzed by the BD Scanto II system or the MACSQuant system. The granulocyte population was gated on the basis of cellular granularity, cell size, and CD45 level.

low: p.Ile537Met, p.Leu131\* (family 5), > p.His407Arg (family 3), ≥ p.Gln282\_Trp283insArgCysGln (families 4, 6, 7, and 10), > p.Arg232His, p.Val28 6Leu (family 2), > p.Arg71Gln, and p.Ala388Pro (family 1). Note that the c.847-10A>G mutation has a minor allele frequency of 0.046% in South Asians and 0.002% in Europeans. It is thus not so rare in South Asians, but no homozygotes were found in gnomAD. Nevertheless, it still does not have such a high frequency as the pathogenic *PGAP3* GenBank: NM\_033419.4; c.\*559C>T mutation that is found in Europeans (0.6%) and was implicated in another IGD (HPMRS4; MIM: 615716).

These results correlate with the clinical severities: the individuals from families 1 and 2 showed severe development delay, axonal degenerative polyneuropathy, dysmorphic facies and ears, hearing loss, visual impairment, and

finger abnormalities, whereas the one from family 5 showed no dysmorphism and experienced seizures later in infancy. Notably, some affected individuals (family 1) with a severe phenotype were diagnosed with DOORS syndrome. Because the defining symptoms of DOORS syndrome (deafness, onycho-osteodystrophy, mental retardation, and seizures) completely fit with severe forms of IGDs, this clinical description also fits reported cases of IGDs caused by mutation in other genes.<sup>12,13</sup> DOORS syndrome is mainly caused by bi-allelic mutations in *TBC1D24*. It is important to clarify whether clinical overlap between IGDs and *TBC1D24* deficiency are related to a chance similarity of symptoms or whether they have some link in pathophysiology, especially when considering the management of these individuals (Table S2). *TBC1D24* was reported to negatively regulate both RAB35 and ARF6 by working as a

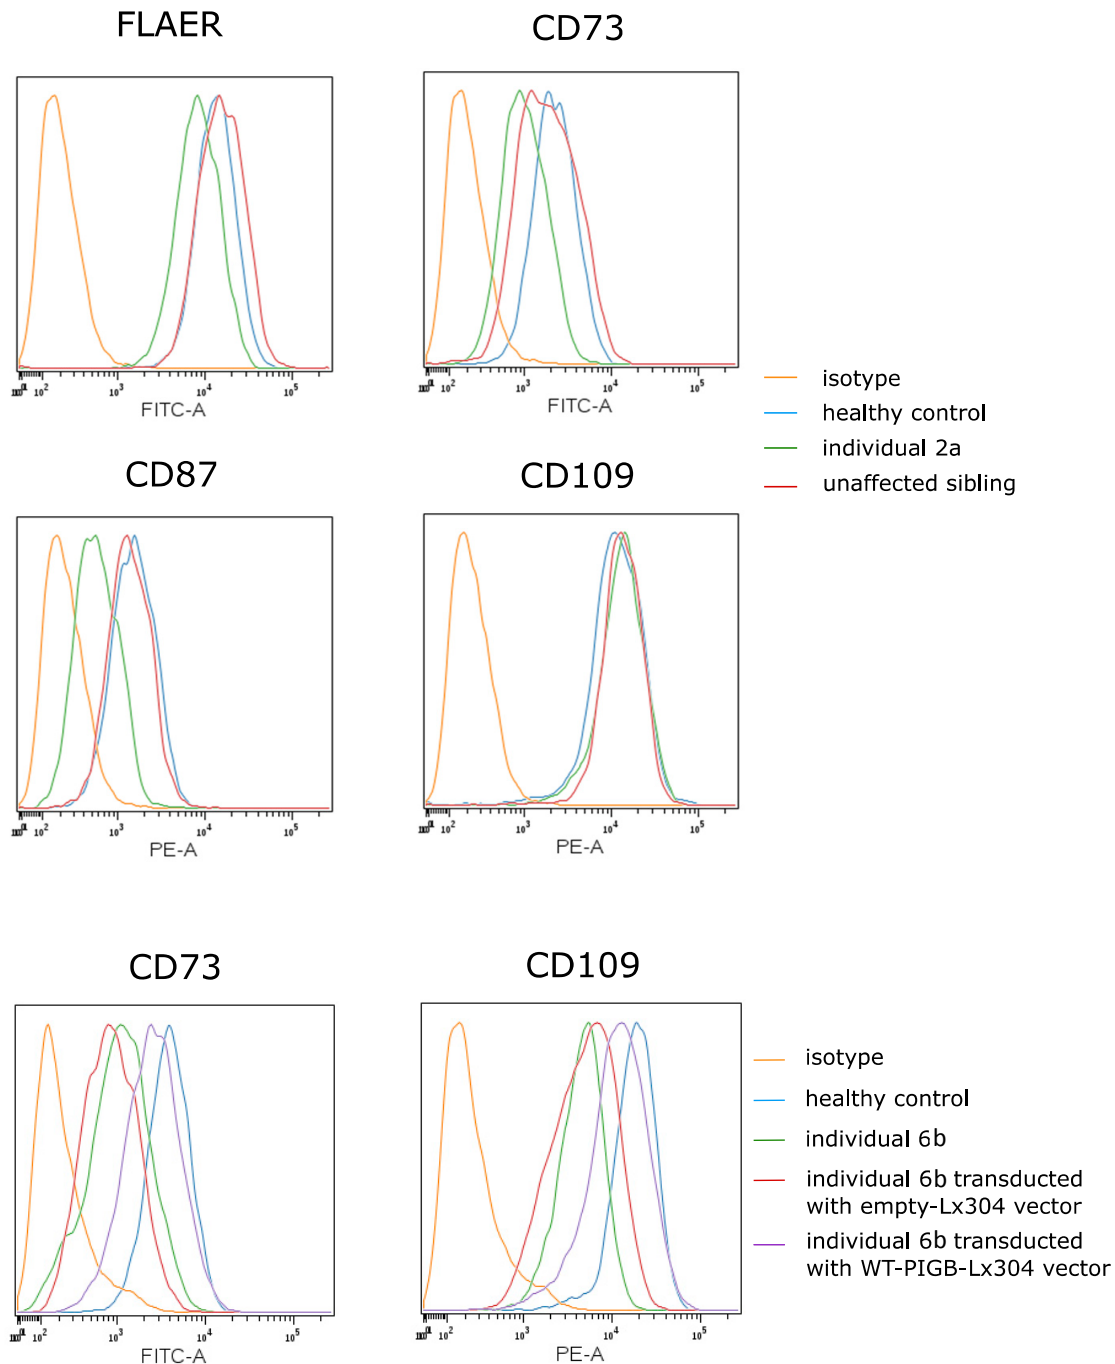

**Figure 4. Decreased Level of GPI-AP in the Fibroblasts and Rescue by *PIGB*-Expressing Lentivector**

Skin fibroblasts derived from individuals 2A and 6B were stained with FLAER, CD73, CD87, and CD109 and were analyzed by the BD FACScanto II system and then by Cytobank software. Fibroblasts from individual 6B were transduced with *PIGB*-expressing-Lx304 lentivirus or empty-vector lentivirus, and these fibroblasts were stained with CD73 and CD109 as described above. The figure shows representative results from experiments done in triplicate.

GTPase-activating protein (GAP) for these small G proteins.<sup>14–16</sup> Effector proteins modulate the crosstalk between RAB35 and ARF6 and thereby regulate endocytosis and the recycling of surface proteins, including GPI-APs.<sup>16,17</sup> Thus, *TBC1D24* deficiency might affect the surface levels of GPI-APs on neurons, suggesting some pathological relationship between IGDs and DOORS syndrome. The evidence that two of the individuals affected with severe *PIGB* deficiency

showed 2-oxoglutaric aciduria, an intermediate in the TCA cycle, sharing the characteristic metabolic abnormality of DOORS syndrome, supports the suggestion above. Individuals who have DOORS syndrome with *TBC1D24* deficiency show 2-oxoglutaric aciduria in a high proportion of cases; however, the mechanism of this is still unknown. 2-oxoglutaric aciduria can be caused by the decreased activity of the 2-oxoglutaric dehydrogenase in the TCA cycle,



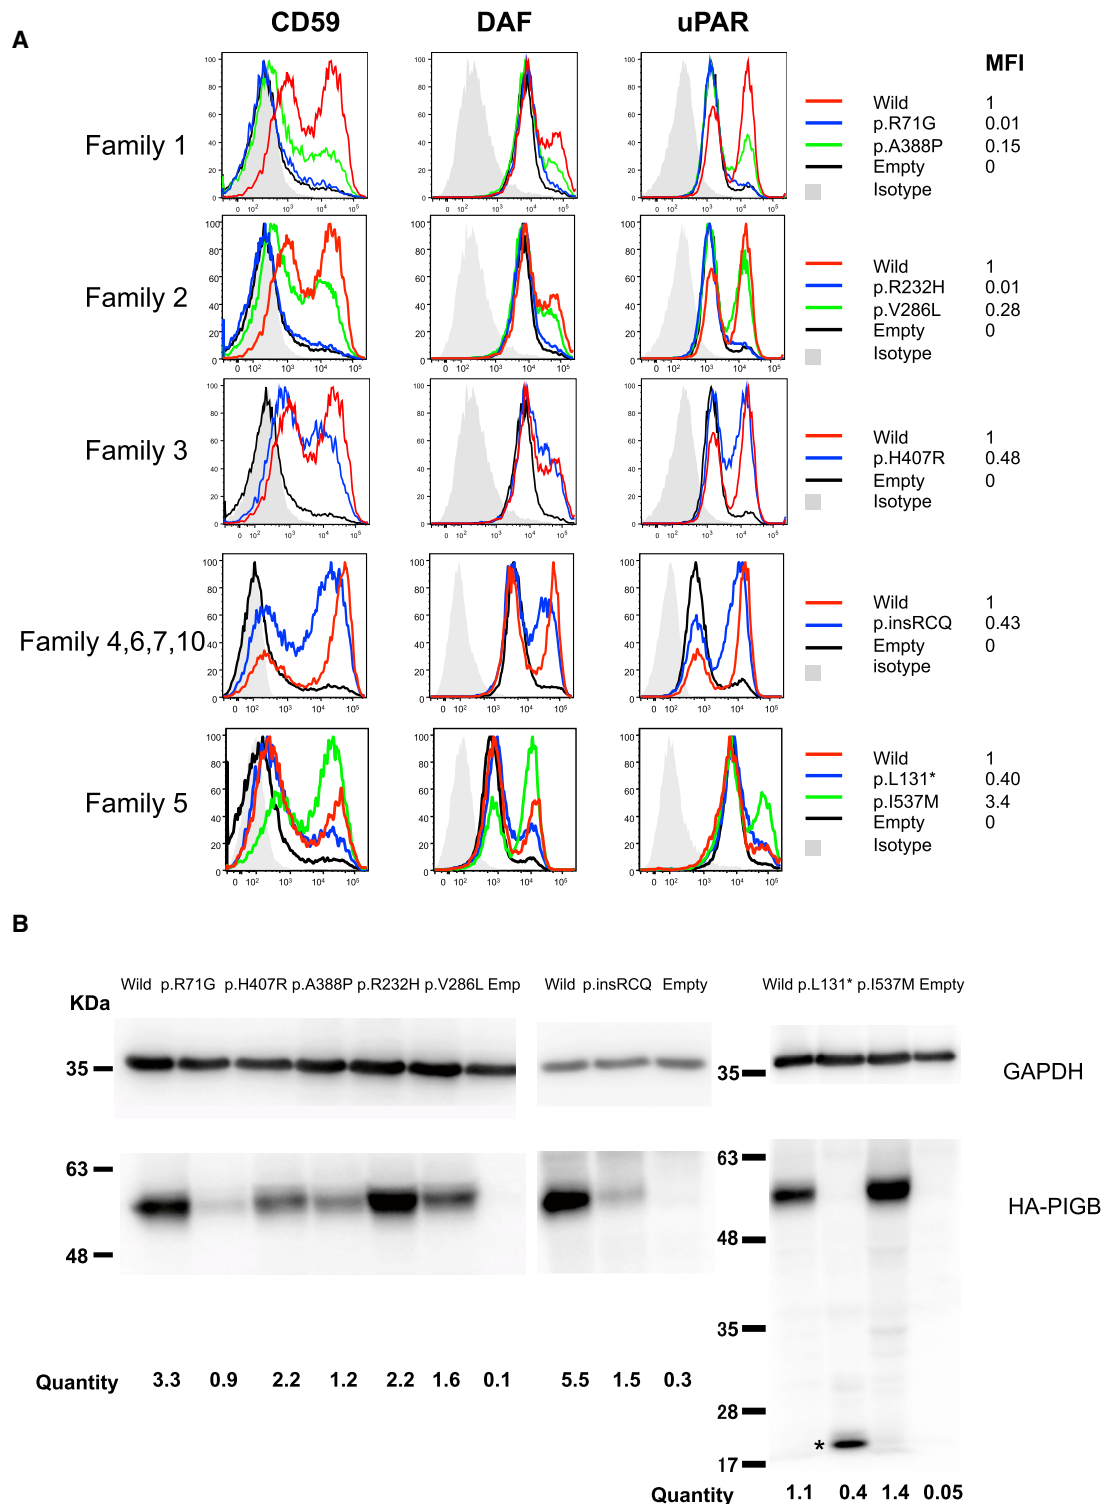

**Figure 5. Functional Analysis of the Mutant *PIGB* cDNAs Found in the Families**

(A) *PIGB*-deficient CHO cells were transiently transfected with wild-type and mutant HA-tagged *PIGB* cDNAs subcloned in pME (strong SR $\alpha$  promoter-driven vector). Restoration of the surface expression of CD59, CD55 (DAF), and uPAR was assessed two days later by flow cytometry. Black lines indicate the empty vector; green and blue lines indicate various types of mutant *PIGB*; the red line indicates wild-type *PIGB*; and light gray shadows indicate isotype controls. Various missense variants, except for I537M, driven by a strong promoter only partially rescued the expression of GPI-APs compared to wild-type *PIGB*.

(B) Levels of the mutant *PIGB*. Lysates of the transfectants were subjected to SDS-PAGE and immunoblotting. For quantification, levels of *PIGB* were determined by dividing *PIGB* band intensities by GAPDH band intensities and luciferase activity to normalize for both loading and transfection efficiencies. \* = truncated *PIGB*. Expression levels of mutant *PIGB*, except for the p.I537Met variant, were decreased to various degrees.

which requires vitamin B1 as a coenzyme. Vitamin B1 is absorbed from the intestine as a form of thiamine, either after de-phosphorylation of thiamine monophosphate or thiamine diphosphate. Intestinal alkaline phosphatase (ALP) and tissue non-specific ALP, which are both GPI-APs, play a role in this de-phosphorylation. We speculate that the vitamin B1 concentration in the neurons from IGD is decreased because the surface level of ALP would be decreased,<sup>18</sup> and this leads to accumulation of 2-oxoglutaric acid. 2-oxoglutaric aciduria in *TBC1D24* deficiency might be similarly caused by a decreased level of ALP. These hypotheses should be further investigated. It is interesting to note that abnormally high signals within the brainstem on the diffusion-weighted images of MRI are often observed in severe cases of IGDs, suggesting mitochondrial dysfunction or other metabolic abnormalities,<sup>19,20</sup> and affected individuals with *PIGA* mutations (MIM: 300868) have evidence of mitochondrial dysfunction on biopsied tissues.<sup>20</sup> However, it should be considered that there are many other causes of 2-oxoglutaric aciduria (e.g., multiple mitochondrial diseases, Amish type microcephaly, physiologic immaturity in newborns, high carbohydrate diets, and citrate-based food additives). Yet, in these situations, there usually are not multiple malformations as is seen in IGDs and *TBC1D24* mutations. Because 2-oxoglutaric acid in the urine (as part of a urinary organic acid profile) is not routinely examined in general hospitals, clinicians request it only when they suspect an inborn error of intermediary metabolism. In our cohort, this was measured in eight individuals, and only the severely affected siblings of family 1 showed 2-oxoglutaric aciduria, thus there might be a correlation with the severity of the disease. Note that the levels were not always elevated in both siblings.<sup>7</sup> Such a correlation between 2-oxoglutaric aciduria and disease severity has been proposed for DOORS syndrome,<sup>21</sup> but instead it was demonstrated that the levels can fluctuate with time between normal and elevated and did not correlate with disease severity.<sup>22–24</sup> In addition, because thiamine pyrophosphate is abundantly contained in animal food products, 2-oxoglutaric aciduria can be affected by the diet. It is necessary to measure 2-oxoglutaric acid in the urine from more IGD-affected individuals to clarify the mechanism for this sign.

Regarding the neuropathy, there are interesting correlates to make when considering other known cause of neuropathies. Considering the mitochondrial dysfunction hypothesis mentioned above, demyelinating neuropathy is a known feature of such mitochondrial disorders as neuropathy, ataxia, and retinitis pigmentosa (NARP [MIM: 551500]) and myoneurogastrointestinal encephalopathy (MNGIE [MIM: 603041]). Another condition is inherited CD59 (a GPI-anchored complement regulator) deficiency (MIM: 612300), which is associated with immune-mediated polyneuropathy.<sup>25</sup> Also, a polyneuropathy is seen in vitamin B1 deficiency (see above) and in folate deficiency (the folate receptor is another GPI-AP); in both cases the neuropathy is axonal. Finally, a PLP (pyr-

idoxal 5'-phosphate)-responsive primary axonal peripheral neuropathy and optic atrophy have recently been associated with recessive mutations in *PDXK* (MIM: 179020), encoding a gene involved in converting pyridoxal to the active form of B6, PLP.<sup>26</sup> Given the fact that some children with IGDs have pyridoxine-responsive seizures, this is interesting because alkaline phosphatase also converts PLP to pyridoxal, and this process is essential for B6 to reach the central nervous system (CNS). The mechanism at play in the neuropathy seen in the individuals described here would benefit from model organism studies.

In summary, we characterize an IGD due to *PIGB* deficiency associated with global developmental and/or intellectual delay, early onset epilepsy, and an axonal neuropathy in severe cases. There was clinical overlap with DOORS syndrome, not only with regard to clinical signs, but also at the level of metabolic anomalies. 2-oxoglutaric aciduria in IGDs might be unnoticed, therefore urine organic acids should be measured in individuals with IGDs. This suggests a possible converging molecular mechanism that will need to be assessed in future studies.

### Supplemental Data

Supplemental Data can be found online at <https://doi.org/10.1016/j.ajhg.2019.05.019>.

### Acknowledgments

This work is supported in part by a grant for Research on Measures for Intractable Diseases, a grant for Comprehensive Research on Disability Health and Welfare, the Strategic Research Program for Brain Science (SRPBS) (JP19dm0107090) (N.M.), and the Practical Research Project for Rare/Intractable Diseases from the Japan Agency for Medical Research and Development (AMED) (JP19ek0109280, JP19ek0109301, JP18kk0205001, and JP19ek0109348 for N.M.); Japan Society for the Promotion of Science (JSPS) Grants-in-Aid for Scientific Research (KAKENHI) under grant numbers JP17K15639 (N.M.) and 17K10080 (S.M.); grants from the Ministry of Health, Labor and Welfare (for N.M. and Y.M.); and the Takeda Science Foundation (N.M.). P.M.C. and E.R. are supported by the Canadian Institutes of Health Research (CIHR) (grant number RN 324373) and T.T.M.N. is supported by the Savoy Foundation. T.B.H. was supported by the German Bundesministerium für Bildung und Forschung (BMBF) through the Juniorverbund in der Systemmedizin “mitOmics” (FKZ 01ZX1405C). S.E. is a Wellcome Senior Investigator. We thank Hessa Alsaif, Mohammed Alamoudi, Saori Umeshita, and Kana Miyayagi for technical assistance.

### Declaration of Interests

The Department of Molecular and Human Genetics at Baylor College of Medicine receives revenue from clinical genetic testing conducted at Baylor Genetics. The authors declare no competing interests.

Received: February 8, 2019

Accepted: May 28, 2019

Published: June 27, 2019

## Web Resources

ExAC Browser, <http://exac.broadinstitute.org/>  
GenBank, <https://www.ncbi.nlm.nih.gov/genbank/>  
OMIM, <https://omim.org/>  
UCSC Genome Browser, <https://genome.ucsc.edu/>  
UniProt, <https://www.uniprot.org/uniprot/>  
GeneMatcher (GM), <https://www.genematcher.org/>

## References

1. Kinoshita, T., and Fujita, M. (2016). Biosynthesis of GPI-anchored proteins: Special emphasis on GPI lipid remodeling. *J. Lipid Res.* *57*, 6–24.
2. UniProt Consortium (2015). UniProt: A hub for protein information. *Nucleic Acids Res.* *43*, D204–D212.
3. Knaus, A., Pantel, J.T., Pendziwiat, M., Hajjir, N., Zhao, M., Hsieh, T.C., Schubach, M., Gurovich, Y., Fleischer, N., Jäger, M., et al. (2018). Characterization of glycosylphosphatidylinositol biosynthesis defects by clinical features, flow cytometry, and automated image analysis. *Genome Med.* *10*, 3.
4. Bellai-Dussault, K., Nguyen, T.T.M., Baratang, N.V., Jimenez-Cruz, D.A., and Campeau, P.M. (2019). Clinical variability in inherited glycosylphosphatidylinositol deficiency disorders. *Clin. Genet.* *95*, 112–121.
5. Takahashi, M., Inoue, N., Ohishi, K., Maeda, Y., Nakamura, N., Endo, Y., Fujita, T., Takeda, J., and Kinoshita, T. (1996). PIG-B, a membrane protein of the endoplasmic reticulum with a large luminal domain, is involved in transferring the third mannose of the GPI anchor. *EMBO J.* *15*, 4254–4261.
6. Campeau, P.M., Kasperaviciute, D., Lu, J.T., Burrage, L.C., Kim, C., Hori, M., Powell, B.R., Stewart, F., Félix, T.M., van den Ende, J., et al. (2014). The genetic basis of DOORS syndrome: An exome-sequencing study. *Lancet Neurol.* *13*, 44–58.
7. van Bever, Y., Balemans, W., Duval, E.L., Jespers, A., Eyskens, F., van Hul, W., and Courtens, W. (2007). Exclusion of OGDH and BMP4 as candidate genes in two siblings with autosomal recessive DOOR syndrome. *Am. J. Med. Genet. A.* *143A*, 763–767.
8. Sobreira, N., Schiettecatte, F., Valle, D., and Hamosh, A. (2015). GeneMatcher: A matching tool for connecting investigators with an interest in the same gene. *Hum. Mutat.* *36*, 928–930.
9. Ashida, H., Hong, Y., Murakami, Y., Shishioh, N., Sugimoto, N., Kim, Y.U., Maeda, Y., and Kinoshita, T. (2005). Mammalian PIG-X and yeast Pbn1p are the essential components of glycosylphosphatidylinositol-mannosyltransferase I. *Mol. Biol. Cell* *16*, 1439–1448.
10. Maddirevula, S., Alsahlhi, S., Alhabeeb, L., Patel, N., Alzahrani, F., Shamseldin, H.E., Anazi, S., Ewida, N., Alsaif, H.S., Mohamed, J.Y., et al. (2018). Expanding the phenome and variome of skeletal dysplasia. *Genet. Med.* *20*, 1609–1616.
11. Maddirevula, S., Alzahrani, F., Al-Owain, M., Al Muhaizea, M.A., Kayyali, H.R., AlHashem, A., Rahbeeni, Z., Al-Otaibi, M., Alzaidan, H.I., Balobaid, A., et al. (2019). Autozygome and high throughput confirmation of disease genes candidacy. *Genet. Med.* *21*, 736–742.
12. Alessandri, J.L., Gordon, C.T., Jacquemont, M.L., Gruchy, N., Ajeawung, N.F., Benoist, G., Oufadem, M., Chebil, A., Dufour, Y., Dumont, C., et al. (2018). Recessive loss of function PIGN alleles, including an intragenic deletion with founder effect in La Réunion Island, in patients with Fryns syndrome. *Eur. J. Hum. Genet.* *26*, 340–349.
13. Fleming, L., Lemmon, M., Beck, N., Johnson, M., Mu, W., Murdock, D., Bodurtha, J., Hoover-Fong, J., Cohn, R., Bosemani, T., et al. (2016). Genotype-phenotype correlation of congenital anomalies in multiple congenital anomalies hypotonia seizures syndrome (MCAHS1)/PIGN-related epilepsy. *Am. J. Med. Genet. A.* *170A*, 77–86.
14. Uytterhoeven, V., Kuenen, S., Kasprovicz, J., Miskiewicz, K., and Verstreken, P. (2011). Loss of skywalker reveals synaptic endosomes as sorting stations for synaptic vesicle proteins. *Cell* *145*, 117–132.
15. Falace, A., Buhler, E., Fadda, M., Watrin, F., Lippiello, P., Palesi-Pocachard, E., Baldelli, P., Benfenati, F., Zara, F., Represa, A., et al. (2014). TBC1D24 regulates neuronal migration and maturation through modulation of the ARF6-dependent pathway. *Proc. Natl. Acad. Sci. USA* *111*, 2337–2342.
16. Sheehan, P., and Waites, C.L. (2019). Coordination of synaptic vesicle trafficking and turnover by the Rab35 signaling network. *Small GTPases* *10*, 54–63.
17. Cai, B., Katafiasz, D., Horejsi, V., and Naslavsky, N. (2011). Pre-sorting endosomal transport of the GPI-anchored protein, CD59, is regulated by EHD1. *Traffic* *12*, 102–120.
18. Murakami, Y., Kanzawa, N., Saito, K., Krawitz, P.M., Mundlos, S., Robinson, P.N., Karadimitris, A., Maeda, Y., and Kinoshita, T. (2012). Mechanism for release of alkaline phosphatase caused by glycosylphosphatidylinositol deficiency in patients with hyperphosphatasia mental retardation syndrome. *J. Biol. Chem.* *287*, 6318–6325.
19. Kato, M., Saito, H., Murakami, Y., Kikuchi, K., Watanabe, S., Iai, M., Miya, K., Matsuura, R., Takayama, R., Ohba, C., et al. (2014). PIGA mutations cause early-onset epileptic encephalopathies and distinctive features. *Neurology* *82*, 1587–1596.
20. Tarailo-Graovac, M., Sinclair, G., Stockler-Ipsiroglu, S., Van Allen, M., Rozmus, J., Shyr, C., Biancheri, R., Oh, T., Sayson, B., Lafek, M., et al. (2015). The genotypic and phenotypic spectrum of PIGA deficiency. *Orphanet J. Rare Dis.* *10*, 23.
21. Rajab, A., Riaz, A., Paul, G., Al-Khusaibi, S., Chalmers, R., and Patton, M.A. (2000). Further delineation of the DOOR syndrome. *Clin. Dysmorphol.* *9*, 247–251.
22. Patton, M.A., Krywawych, S., Winter, R.M., Brenton, D.P., and Baraitser, M. (1987). DOOR syndrome (deafness, onycho-osteodystrophy, and mental retardation): Elevated plasma and urinary 2-oxoglutarate in three unrelated patients. *Am. J. Med. Genet.* *26*, 207–215.
23. Félix, T.M., de Menezes Karam, S., Della Rosa, V.A., and Moraes, A.M. (2002). DOOR syndrome: Report of three additional cases. *Clin. Dysmorphol.* *11*, 133–138.
24. James, A.W., Miranda, S.G., Culver, K., Hall, B.D., and Golabi, M. (2007). DOOR syndrome: Clinical report, literature review and discussion of natural history. *Am. J. Med. Genet. A.* *143A*, 2821–2831.
25. Nevo, Y., Ben-Zeev, B., Tabib, A., Straussberg, R., Anikster, Y., Shorer, Z., Fattal-Valevski, A., Ta-Shma, A., Aharoni, S., Rabie, M., et al. (2013). CD59 deficiency is associated with chronic hemolysis and childhood relapsing immune-mediated polyneuropathy. *Blood* *121*, 129–135.
26. Chelban, V., Wilson, M.P., Warman Chardon, J., Vandrovcova, J., Zanetti, M.N., Zamba-Papanicolaou, E., Efthymiou, S., Pope, S., Conte, M.R., Abis, G., et al. (2019). PDXK mutations cause polyneuropathy responsive to PLP supplementation. *Annals of Neurology*.

## Supplemental Data

### Mutations in *PIGB* Cause an Inherited GPI

### Biosynthesis Defect with an Axonal Neuropathy

### and Metabolic Abnormality in Severe Cases

Yoshiko Murakami, Thi Tuyet Mai Nguyen, Nissan Baratang, Praveen K. Raju, Alexej Knaus, Sian Ellard, Gabriela Jones, Baiba Lace, Justine Rousseau, Norbert Fonya Ajeawung, Atsushi Kamei, Gaku Minase, Manami Akasaka, Nami Araya, Eriko Koshimizu, Jenneke van den Ende, Florian Erger, Janine Altmüller, Zita Krumina, Jurgis Strautmanis, Inna Inashkina, Janis Stavusis, Areeg El-Gharbawy, Jessica Sebastian, Ratna Dua Puri, Samarth Kulshrestha, Ishwar C. Verma, Esther M. Maier, Tobias B. Haack, Anil Israni, Julia Baptista, Adam Gunning, Jill A. Rosenfeld, Pengfei Liu, Marieke Joosten, María Eugenia Rocha, Mais O. Hashem, Hesham M. Aldhalaan, Fowzan S. Alkuraya, Satoko Miyatake, Naomichi Matsumoto, Peter M. Krawitz, Elsa Rossignol, Taroh Kinoshita, and Philippe M. Campeau

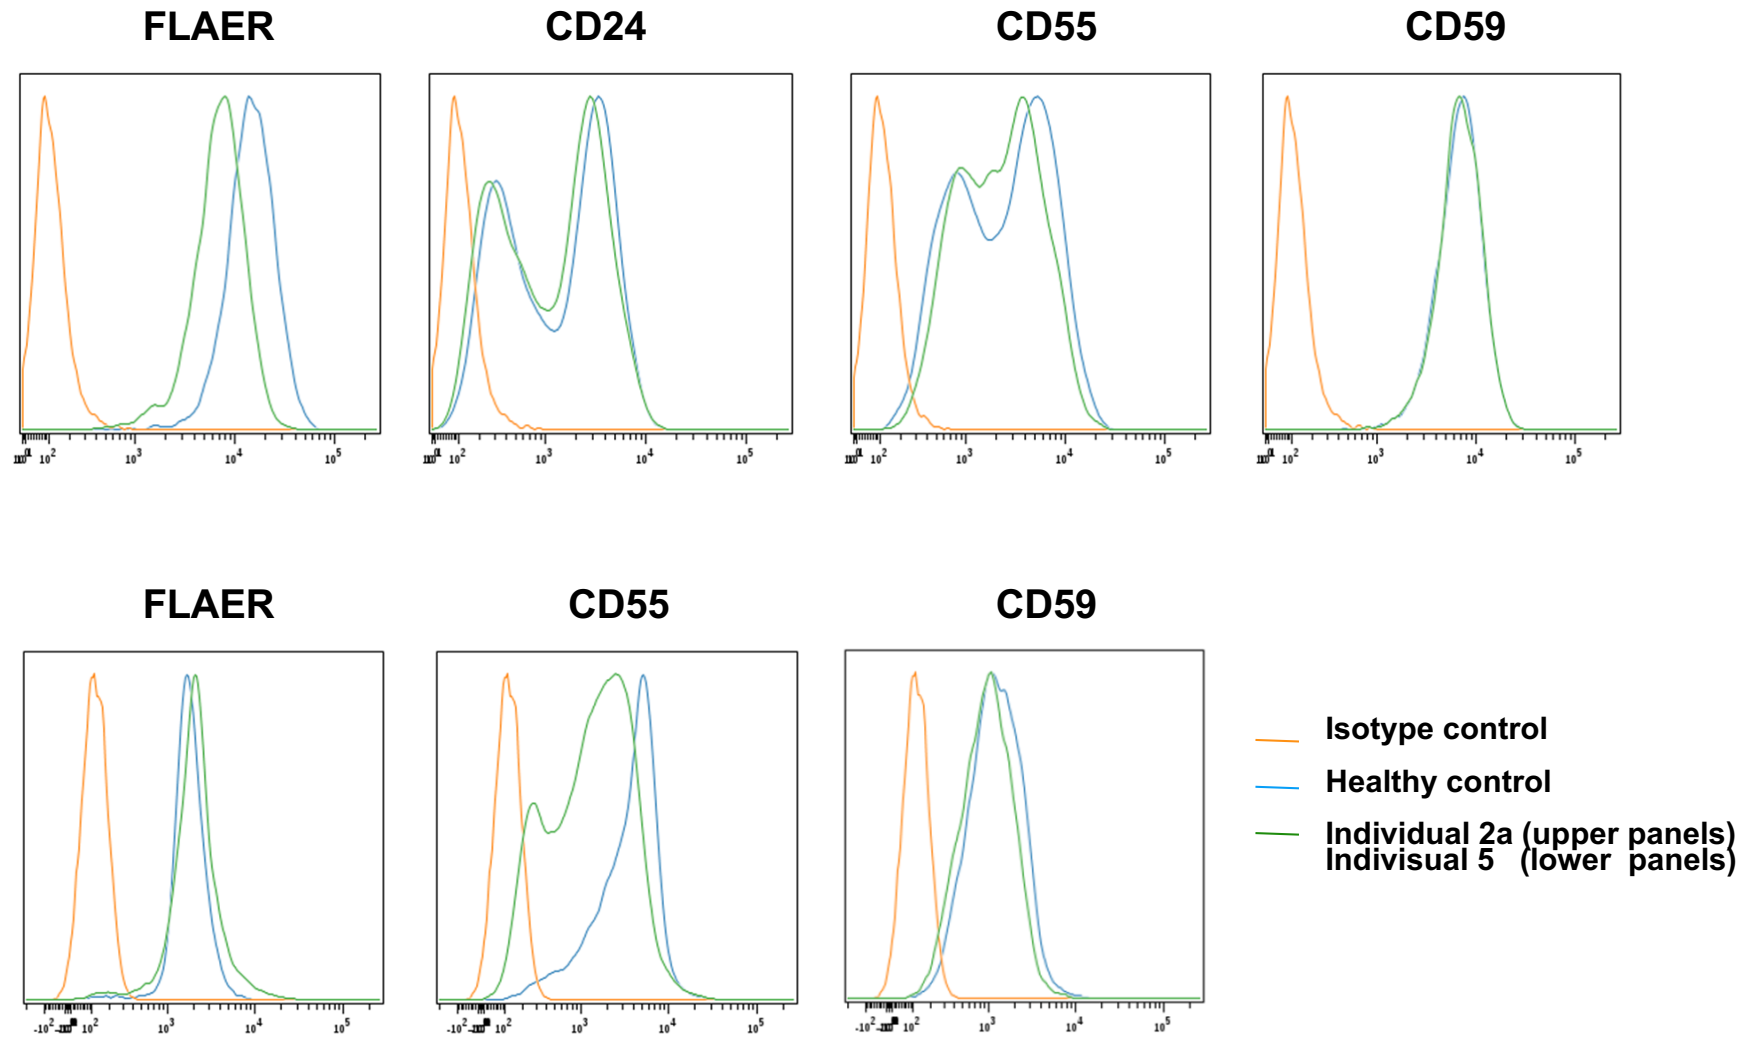

**Figure S1. Flow cytometry analysis of cell surface GPI-APs of lymphoblastoids and lymphocytes of individual 2a and 5, respectively.** : Upper panels, LCLs of individual 2a established by Epstein-Barr virus immortalization of peripheral blood mononuclear cells (PBMC) were stained with GPI-AP markers (FLAER, CD24, CD55 and CD59). Lower panels, lymphocyte population from blood sample of individual 5 in the same experiments shown in Figure 5B was gated to analyze using the Cytobank software. The figure shows representative results from experiments done in triplicate.

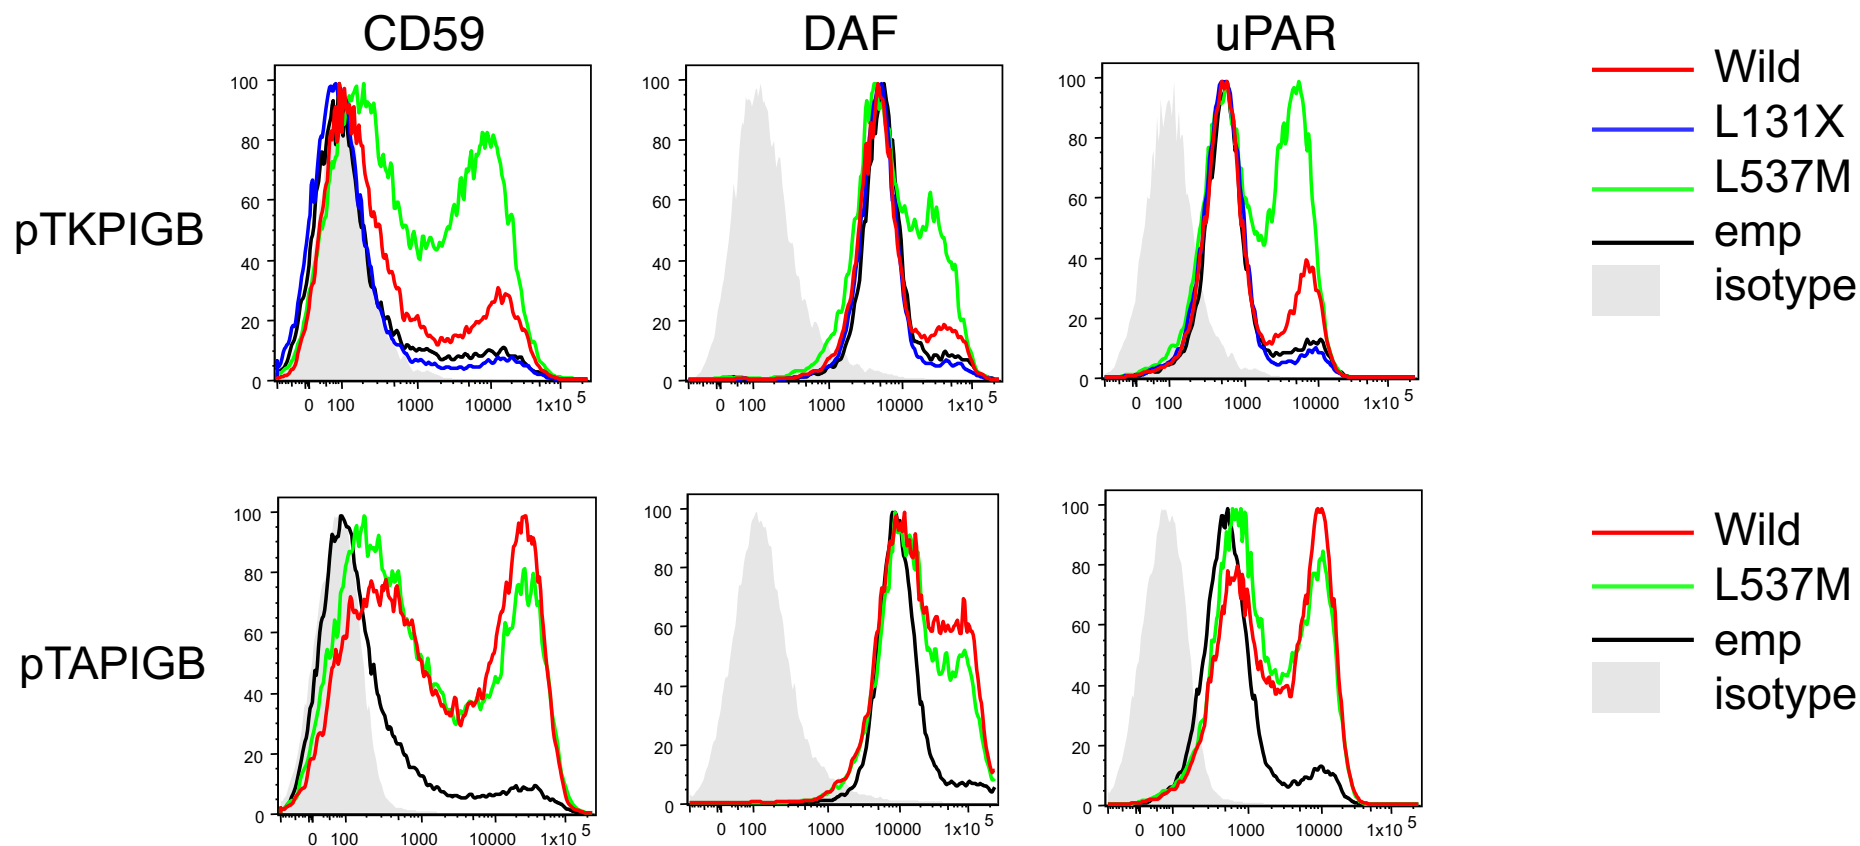

**Figure S2. Functional analysis of the mutant *PIGB* cDNAs found in family 5 using weak promoters:**

*PIGB*-deficient CHO cells were transiently transfected with wild-type and mutant *PIGB* cDNAs subcloned in pTK (medium strong promoter) (upper panels) and in pTA (weak promoter) (lower panels). Restoration of the surface expression of CD59, CD55 (DAF) and uPAR was assessed 2 days later by flow cytometry. Black lines, empty vector; green and blue lines, various mutant *PIGB*; red line, wild-type *PIGB*; light-gray shadows, isotype controls.

**Table S1. Detailed phenotypes**

| Family                           | 1                                                                                                         |                                                                                 | 2                |                                                                                                             | 3                                                                                                                                                                                                                                                                                                          | 4                                                  | 5                                                                | 6                                                                                                |                                                                                                  | 7                                                                              | 8                                                                                                                                                                                                       | 9                                                                                                                                                                                                                     | 10                                                                                                                                         |                                                                                                                                                                    |
|----------------------------------|-----------------------------------------------------------------------------------------------------------|---------------------------------------------------------------------------------|------------------|-------------------------------------------------------------------------------------------------------------|------------------------------------------------------------------------------------------------------------------------------------------------------------------------------------------------------------------------------------------------------------------------------------------------------------|----------------------------------------------------|------------------------------------------------------------------|--------------------------------------------------------------------------------------------------|--------------------------------------------------------------------------------------------------|--------------------------------------------------------------------------------|---------------------------------------------------------------------------------------------------------------------------------------------------------------------------------------------------------|-----------------------------------------------------------------------------------------------------------------------------------------------------------------------------------------------------------------------|--------------------------------------------------------------------------------------------------------------------------------------------|--------------------------------------------------------------------------------------------------------------------------------------------------------------------|
| Individual                       | 1a                                                                                                        | 1b                                                                              | 2a               | 2b                                                                                                          | 3                                                                                                                                                                                                                                                                                                          | 4                                                  | 5                                                                | 6a                                                                                               | 6b                                                                                               | 7                                                                              | 8a                                                                                                                                                                                                      | 9b                                                                                                                                                                                                                    | 10a                                                                                                                                        | 10b                                                                                                                                                                |
| Consanguinity                    | N                                                                                                         | N                                                                               | N                | N                                                                                                           | Y                                                                                                                                                                                                                                                                                                          | N                                                  | N                                                                | Y                                                                                                | Y                                                                                                | Y                                                                              | Y                                                                                                                                                                                                       | Y                                                                                                                                                                                                                     | N                                                                                                                                          | N                                                                                                                                                                  |
| Gender                           | M                                                                                                         | F                                                                               | F                | M                                                                                                           | F                                                                                                                                                                                                                                                                                                          | F                                                  | F                                                                | F                                                                                                | F                                                                                                | F                                                                              | M                                                                                                                                                                                                       | M                                                                                                                                                                                                                     | M                                                                                                                                          | M                                                                                                                                                                  |
| Age at last examination          | 5y                                                                                                        | 3.8y                                                                            | 13y              | 11m                                                                                                         | 6m                                                                                                                                                                                                                                                                                                         | 4y                                                 | 19y                                                              | 4m                                                                                               | 8m                                                                                               | 8m                                                                             | 2d (deceased)                                                                                                                                                                                           | 18m                                                                                                                                                                                                                   | 6 m                                                                                                                                        | 4 m                                                                                                                                                                |
| Height, cm                       | NA                                                                                                        | NA                                                                              |                  | 76                                                                                                          |                                                                                                                                                                                                                                                                                                            |                                                    | 158                                                              | 54                                                                                               | 66                                                                                               | 65                                                                             |                                                                                                                                                                                                         | 83                                                                                                                                                                                                                    | 63                                                                                                                                         | -                                                                                                                                                                  |
| Weight, kg                       | NA                                                                                                        | NA                                                                              |                  | 9.5                                                                                                         |                                                                                                                                                                                                                                                                                                            |                                                    | 75                                                               | 5.7                                                                                              | 8.66                                                                                             | 7.2                                                                            |                                                                                                                                                                                                         | 11.5                                                                                                                                                                                                                  | 4.5                                                                                                                                        | 5.8                                                                                                                                                                |
| OFC, cm                          | NA                                                                                                        | NA                                                                              |                  | 44.5                                                                                                        |                                                                                                                                                                                                                                                                                                            |                                                    | 55.5                                                             | 38.5                                                                                             | 43                                                                                               | 41.5                                                                           | large                                                                                                                                                                                                   | 46.2                                                                                                                                                                                                                  | 40                                                                                                                                         | -                                                                                                                                                                  |
| DD/ID                            | Y                                                                                                         | Y                                                                               | Y, +++           | Y, +++                                                                                                      | Y                                                                                                                                                                                                                                                                                                          | Y                                                  | Y                                                                | Y, +++                                                                                           | Y, +++                                                                                           | Y                                                                              |                                                                                                                                                                                                         |                                                                                                                                                                                                                       | Y                                                                                                                                          | Y                                                                                                                                                                  |
| Hypotonia                        | Y                                                                                                         | Y                                                                               | NA               | Y                                                                                                           | Y                                                                                                                                                                                                                                                                                                          | N                                                  | Y                                                                | Y                                                                                                | Y                                                                                                | Y                                                                              | NA                                                                                                                                                                                                      | Y                                                                                                                                                                                                                     | Y                                                                                                                                          | Y                                                                                                                                                                  |
| Seizures (and start)             | Y, Myoclonic 3w                                                                                           | Y, GTCS 3m                                                                      | Y, 6m            | Y, GTCS, 1m                                                                                                 | Y, with Hypsarrhythmia                                                                                                                                                                                                                                                                                     | Y, 1y                                              | Y, infantile                                                     | Y, 3d                                                                                            | Y, 3m                                                                                            | Y, 3m                                                                          | Y, 1d (on EEG)                                                                                                                                                                                          | Y, infantile                                                                                                                                                                                                          | Y, 2 w                                                                                                                                     | Y, 1 m                                                                                                                                                             |
| Seizure responsiveness           | NA                                                                                                        | Refractory                                                                      | Sodium valproate | Refractory                                                                                                  | NA                                                                                                                                                                                                                                                                                                         | Potassium bromide, Levetiracetam, Sodium valproate | Carbamazepine                                                    | Refractory                                                                                       | Sodium valproate, Phenytoin, Phenobarbital, Levetiracetam                                        | Refractory                                                                     | Phenobarbital Midazolam                                                                                                                                                                                 | Phenobarbital                                                                                                                                                                                                         | Levetiracetam                                                                                                                              | Refractory                                                                                                                                                         |
| Other neurological abnormalities | Axonal degenerative polyneuropathy                                                                        | Axonal degenerative polyneuropathy                                              | Absent reflexes  | Mixed axonal loss Demyelinating sensorimotor polyneuropathy. Absent reflexes                                | Poor feeding, absent otoacoustic emissions                                                                                                                                                                                                                                                                 | Epileptic encephalopathy                           | Hypohydrosis                                                     | NA                                                                                               | NA                                                                                               | Weak reflexes, Episodes of apnea                                               | NA                                                                                                                                                                                                      |                                                                                                                                                                                                                       | Poor feeding, Hyperthermia, Sensorimotor axonal polyneuropathy                                                                             | Poor suck, Mixed axonal and demyelinating polyneuropathy                                                                                                           |
| MRI                              | Normal posterior fossa Thin corpus callosum.                                                              | Hyperdensities in the pons cerebri callosum.                                    | Normal           | Normal at 5 m (Calcifications in left thalamus on ultrasound at 1 m)                                        | Mild dilatation of ventricles, Poor myelination, thinning of the white matter, diffusion restriction in the central tegmental tracts, hyperintensity of the globus pallidus scalloping of the calvarium related to delayed synostosis repair                                                               | Normal                                             | Normal                                                           | Normal                                                                                           | Normal                                                                                           | Dilatation of ventricles                                                       | Post-mortem MRI: Dandy walker malformation Vermis hypoplasia, Thin corpus callosum, Pontine hypoplasia. Possibly diffuse polymicrogyria, Possibly intracranial vessel tortuosity.                       | (9a)F Polymicrogyria along the bilateral occipital lobes. Diffuse cerebral volume loss. Hypomyelination in periventricular and subcortical white matter more pronounced at the bilateral occipital and frontal lobes. | 16 days Multiple foci of Altered signal intensity bilateral periventricular and subcortical region                                         | Thin corpus callosum with hypoplastic splenium, Mild prominence of lateral ventricles, Symmetric areas of restricted diffusivity in posterior pons and medulla     |
| Dysmorphisms                     | Dysplastic ears, upslanting palpebral fissures, full cheeks, micrognathia, tented mouth, and high palate. | Metopic ridge, biparietal narrowing, Dysplastic ears, full cheeks, micrognathia |                  | Broad nasal bridge, Large mouth with protruding tongue Overfolded helix, frontal lobule of ear, bilaterally | Hypertelorism, Coarse facial features, Wide protruding eyes (proptosis), Low set ears, High arched palate, Retromicrognathia, Craniosynostosis (Coronal, Sagittal, metopic) with Scaphocephaly, mildly overfold superior helixes bilaterally, low set and posteriorly rotated ears, hypoplastic nasal alae | Normal                                             | Coarse facial features, large tongue, slightly upturned earlobes | Broad nasal bridge, Long smooth philtrum, Tented upper lip, Full cheeks, Large upturned earlobes | Broad nasal bridge, Long smooth philtrum, Tented upper lip, Full cheeks, Large upturned earlobes | Low-set, posteriorly rotated ears, Wide nasal bridge Bulbous tip, Retrognathia | Coarse facial features, Hypertelorism, Long palpebral fissures, Epicanthus inversus, Broad eyebrows, Broad nose, Short columella, Long philtrum, Short chin., Coarse, large earlobes, Overfolded helix. | NA                                                                                                                                                                                                                    | Facial hypertrichosis, Coarse facies, Long smooth philtrum, Prominent nasal tip, Pointed chin with horizontal crease, Uplifted ear lobules | Facial hypertrichosis, Gum hypertrophy, Large ears with uplifted ear lobules, Small neck, Coarse facies, Long smooth philtrum, Pointed chin with horizontal crease |

|                                   |                                                                                        |                                                                                                          |                                                                                                                                                    |                                                                                   |                                                                                                                                                                                               |                             |                                                |                                    |                                    |                                                                                                             |                                                                                                                     |                                                                                                                    |                                                                                                                                                     |                                                                                                                                        |
|-----------------------------------|----------------------------------------------------------------------------------------|----------------------------------------------------------------------------------------------------------|----------------------------------------------------------------------------------------------------------------------------------------------------|-----------------------------------------------------------------------------------|-----------------------------------------------------------------------------------------------------------------------------------------------------------------------------------------------|-----------------------------|------------------------------------------------|------------------------------------|------------------------------------|-------------------------------------------------------------------------------------------------------------|---------------------------------------------------------------------------------------------------------------------|--------------------------------------------------------------------------------------------------------------------|-----------------------------------------------------------------------------------------------------------------------------------------------------|----------------------------------------------------------------------------------------------------------------------------------------|
| Hearing                           | BAEP and OAE showed little or no response bilaterally                                  | Unilat hearing loss.                                                                                     | 50-60 db                                                                                                                                           |                                                                                   | Impaired                                                                                                                                                                                      | Normal                      | Normal                                         |                                    |                                    | TEOAE showed no response bilaterally                                                                        | NA                                                                                                                  | NA                                                                                                                 | Impaired BAEP at birth - normal                                                                                                                     | Impaired BAEP – not done                                                                                                               |
| Vision                            | At age 2 months he had a normal fundus, VEP showed a weak response, and ERG was normal | Short fixation, abnormal eye movements, and intermittent strabismus. VEP and ERG show decreased response | Impaired Bilateral, myopia gravis, ou, ou retinal depigmentation and initial dystrophic changes                                                    | Impaired, Pale optic disc on fundoscopy                                           | left corneal opacity. Exposure keratopathy, corneal ulcers, increased ICP, gaze evoked nystagmus. Diffuse epitheliad effects bilaterally, poor vision. Inability to close eyelids since birth | Normal                      | Normal                                         | Impaired. Unable to fix and follow | Impaired. Unable to fix and follow | VEP showed no response bilaterally                                                                          | NA                                                                                                                  | NA                                                                                                                 | NA                                                                                                                                                  | NA                                                                                                                                     |
| Digital anomalies                 | Triphalangeal thumb, Brachytelephalangy and hypoplastic nails hands and feet           | Triphalangeal thumb, Brachytelephalangy and hypoplastic nails hands and feet                             | N                                                                                                                                                  | Transverse palmar crease                                                          | Flexion contractures of fingers, suspicion of triphalangeal thumbs, Shortening of distal phalanges with tapering fingers, Hypoplastic nails, Bilateral single palmar creases                  | N                           | Y                                              | N                                  | N                                  | Hypoplastic nails on hands and feet                                                                         | Brachydactyly, Absent nails on digit 5 of both hands and on digits 3-5 of the feet. Aberrant dermatoglyphic pattern | NA                                                                                                                 | Bilateral toes hypoplasia with hypoplasia / absent terminal phalanges, Nail hypoplasia, 5 <sup>th</sup> finger hypoplasia and absent distal phalanx | Bilateral toes hypoplasia with hypoplastic / absent terminal phalanges, 5 <sup>th</sup> finger hypoplasia and absent distal phalanx    |
| Plasma alkaline phosphatase (U/L) | NA                                                                                     | NA                                                                                                       | Normal (356 U/L, normal <1000)                                                                                                                     | NA                                                                                | Elevated                                                                                                                                                                                      | Elevated                    | Elevated (1000-1500 U/L)                       | Elevated (1000-1500 U/L)           | Elevated                           | NA                                                                                                          | NA                                                                                                                  | Elevated (1272) [normal 150 – 420]                                                                                 | Elevated (1546)                                                                                                                                     |                                                                                                                                        |
| Other clinical features           | 2-oxoglutaric aciduria                                                                 | 2-oxoglutaric aciduria                                                                                   | Born at 34 weeks, Pes equinovarus, hyperactive bladder, Severe constipation, achillotomy, Frequent respiratory infection, transient hypothyroidism | exocrine pancreatic insufficiency. Severe constipation. Pyelectasis. Hepatomegaly | Premature birth, hypoplasia of labia majora and minora, Small chest, Cardiac: ASD, PFO and aneurysm of the interatrial septum, moderate pulmonary hypertension                                |                             | Hypohydrosis, very dry, scaly skin elevated CK | Anal stenosis, polyhydramnios      | Polyhydramnios, Hydronephrosis     | Severe failure to thrive Necessitated PEG feeding tube Pulmonary hypertension, Left ventricular hypertrophy | Micropenis, Abnormal heart axis. Similarly affected cousin, also homozygous for variant.                            | NA                                                                                                                 | Born at 37 weeks. Poor suck and feeding since birth, persistent lethargy, constipation, EEG – burst suppression pattern, Rough, wrinkled skin       | Antenatal – increased nuchal fold thickness, 30 wks gestation – polyhydramnios, protuberant abdomen and upper lip Rough, wrinkled skin |
| Outcome                           | Lost to follow-up                                                                      | Died at 3.8y                                                                                             |                                                                                                                                                    | Died                                                                              | Died                                                                                                                                                                                          | Seizures decreased at age 4 | Seizures resolved at age 4 years               | Died at 6 months                   |                                    | Recurrent respiratory insufficiency and pneumonia, palliative care started at 8 months of age               | Died day 2                                                                                                          | infantile onset focal motor seizure with preserved consciousness. Similarly affected sibling passed away at age 4. | Died at 6 months                                                                                                                                    | Died at 6 months                                                                                                                       |

TEOAE : Transiently Evoked otoacoustic Emission, BAEP: brainstem auditory evoked potentials, VEP: Visual evoked potentials, ERG: Electroretinogram



**Table S2. Common symptoms between IGDs and DOORS syndrome**

| Syndrome name                                    | IGD          |      |      |      |      |      |      |      |      |              |       |       |          | DOORS   |
|--------------------------------------------------|--------------|------|------|------|------|------|------|------|------|--------------|-------|-------|----------|---------|
| Mutated gene                                     | PIGA,C,P,H,Q | PIGL | PIGW | PIGM | PIGV | PIGN | PIGB | PIGO | PIGG | PIGT,S,GPAA1 | PGAP1 | PGAP2 | PGAP3    | TBC1D24 |
| Deafness                                         | Y            | Y    | NR   | NR   | Y    | Y    | Y    | Y    | NR   | Y            | NR    | Y     | NR       | Y       |
| Nail anomalies                                   | Y            | NR   | NR   | NR   | Y    | Y    | Y    | Y    | NR   | Y            | NR    | Y     | NR       | Y       |
| Short fingers or hands                           | Y            | Y    | NR   | NR   | Y    | Y    | Y    | Y    | NR   | Y            | NR    | Y     | NR       | Y       |
| DD/ID                                            | Y            | Y    | Y    | Y    | Y    | Y    | Y    | Y    | Y    | Y            | Y     | Y     | Y        | Y       |
| Seizures                                         | Y            | Y    | Y    | Y    | Y    | Y    | Y    | Y    | Y    | Y            | Y     | Y     | Y        | Y       |
| MRI anomalies                                    | Y            | Y    | Y    | NR   | Y    | Y    | Y    | Y    | Y    | Y            | Y     | Y     | Y        | Y       |
| Craniosynostosis                                 | Y            | NR   | NR   | NR   | NR   | NR   | N    | Y    | NR   | Y            | NR    | NR    | NR       | Y       |
| Cranial shape anomalies                          | Y            | Y    | NR   | NR   | NR   | Y    | Y    | NR   | NR   | Y            | NR    | NR    | NR       | Y       |
| Ophthalmological anomalies                       | Y            | Y    | NR   | NR   | NR   | Y    | Y    | Y    | NR   | Y            | NR    | NR    | NR       | Y       |
| Cardiac anomalies                                | Y            | Y    | NR   | NR   | Y    | Y    | Y    | Y    | NR   | Y            | NR    | Y     | NR       | Y       |
| GU malformation                                  | Y            | Y    | NR   | NR   | Y    | Y    | N    | Y    | NR   | Y            | NR    | Y     | NR       | Y       |
| Nephrocalcinosis                                 | NR           | NR   | NR   | NR   | NR   | NR   | N    | NR   | NR   | Y            | NR    | NR    | NR       | Y       |
| Teeth anomalies                                  | Y            | Y    | NR   | NR   | NR   | NR   | N    | NR   | NR   | Y            | NR    | NR    | NR       | Y       |
| Hirschsprung disease                             | NR           | NR   | NR   | NR   | Y    | NR   | Y    | Y    | NR   | NR           | NR    | Y     | NR       | NR      |
| anal atresia                                     | Y            | NR   | NR   | NR   | Y    | NR   | Y    | Y    | NR   | NR           | NR    | Y     | NR       | NR      |
| diaphragmatic hernia                             | NR           | NR   | NR   | NR   | Y    | Y    | NR   | NR   | NR   | NR           | NR    | NR    | NR       | NR      |
| Serum alkaline phosphatase                       | mild↑        | ↑    | ↑    | NR   | ↑    | NR   | ↑    | ↑    | NR   | ↓            | NR    | ↑     | ↑        | NR      |
| 2-oxoglutaric aciduria                           | NR           | NR   | NR   | NR   | NR   | NR   | ↑    | NR   | NR   | NR           | NR    | NR    | NR       | ↑       |
| Decreased expression of CD16 on the granulocytes | Y            | Y    | Y    | Y    | Y    | Y    | Y    | Y    | N    | Y            | N     | Y     | slightly | N       |

IGDs with orange color fit diagnostic criteria of DOORS syndrome

## Supplemental Materials and Methods

### Whole exome sequencing (WES)

For individual 1a, exome sequencing and analysis was performed as described<sup>1</sup>. For individuals 2a and 3, clinical WES was performed at Baylor Genetics as described previously<sup>2</sup>. For individual 4, WES using the DNA derived from the blood leukocytes of the proband was carried out as described previously<sup>3</sup>. In brief, genomic DNA was captured using the SureSelect Human All Exon V5 kit (Agilent Technologies, Santa Clara, CA, USA) and sequenced on a Illumina HiSeq2500 (Illumina, San Diego, CA, USA) with 101-bp paired-end reads. Image analysis and base calling were performed using sequence control software with real-time analysis and CASAVA software (Illumina). Reads were aligned to GRCh37 using Novoalign (<http://www.novocraft.com/>). Marking PCR duplicates, indel realignment, and base-quality-score recalibration were performed using Picard (<http://picard.sourceforge.net/>) and Genome Analysis ToolKit (GATK) (<https://www.broadinstitute.org/gatk/index.php>). Variants were called by the GATK UnifiedGenotyper (<http://www.broadinstitute.org/gatk/>) and annotated using ANNOVAR (<http://www.openbioinformatics.org/annovar/>) after excluding the common variants registered in the dbSNP135 database (minor allele frequency $\geq$ 0.01). Detected variants were confirmed by Sanger sequencing. For individual 5, exome was performed as described previously<sup>4</sup>. For individual 6, exome was performed as described previously<sup>5</sup>. As for WES for individual 7, SureSelect Human All Exon V6 Kit was used, sequenced on an Illumina HiSeq4000 with 2x75bp PE reads. Basecalling and variant annotation were performed on the Cologne Center for Genomics in-house varbank pipeline on the GRCh37 reference genome. For individual 8a, exome was performed as previously described<sup>6</sup>. For individual 9b, exome was performed as described previously<sup>7</sup>. For individual 10b, whole genome sequencing was performed at Centogene on HiSeqX platform (Illumina, San Diego, CA, USA) with an average coverage of ~30x and a read length of 150 base pair paired-end reads. Fastq reads were aligned

against GRCh 37 human genome assembly using BWA aligner (<http://bio-bwa.sourceforge.net/>). Next, PICARD tool set was used to remove PCR duplicates and Genome analysis Toolkit (GATK) (<https://software.broadinstitute.org/gatk/>) was applied for base quality score recalibration. Variants were called using GATK HaplotypeCaller and annotation was performed using ANNOVAR (<http://www.openbioinformatics.org/annovar/>). Variants with Minor allele frequency (MAF)  $\geq 1\%$  in gnomAD database were considered. In addition, family history and clinical indications were put together to identify causative variants.

## References

1. Campeau, P.M., Kasperaviciute, D., Lu, J.T., Burrage, L.C., Kim, C., Hori, M., Powell, B.R., Stewart, F., Felix, T.M., van den Ende, J., et al. (2014). The genetic basis of DOORS syndrome: an exome-sequencing study. *Lancet Neurol* 13, 44-58.
2. Yang, Y., Muzny, D.M., Reid, J.G., Bainbridge, M.N., Willis, A., Ward, P.A., Braxton, A., Beuten, J., Xia, F., Niu, Z., et al. (2013). Clinical whole-exome sequencing for the diagnosis of mendelian disorders. *N Engl J Med* 369, 1502-1511.
3. Miyatake, S., Koshimizu, E., Fujita, A., Fukai, R., Imagawa, E., Ohba, C., Kuki, I., Nukui, M., Araki, A., Makita, Y., et al. (2015). Detecting copy-number variations in whole-exome sequencing data using the eXome Hidden Markov Model: an 'exome-first' approach. *J Hum Genet* 60, 175-182.
4. Koch, J., Freisinger, P., Feichtinger, R.G., Zimmermann, F.A., Rauscher, C., Wagentristl, H.P., Konstantopoulou, V., Seidl, R., Haack, T.B., Prokisch, H., et al. (2015). Mutations in TTC19: expanding the molecular, clinical and biochemical phenotype. *Orphanet journal of rare diseases* 10, 40.

5. Low, K.J., Baptista, J., Babiker, M., Caswell, R., King, C., Ellard, S., and Scurr, I. (2019). Hemizygous UBA5 missense mutation unmasks recessive disorder in a patient with infantile-onset encephalopathy, acquired microcephaly, small cerebellum, movement disorder and severe neurodevelopmental delay. *European journal of medical genetics* 62, 97-102.
6. van den Bogaard, E.H.J., van Geel, M., van Vlijmen-Willems, I., Jansen, P.A.M., Peppelman, M., van Erp, P.E.J., Atalay, S., Venselaar, H., Simon, M.E.H., Joosten, M., et al. (2018). Deficiency of the human cysteine protease inhibitor cystatin M/E causes hypotrichosis and dry skin. *Genetics in medicine: official journal of the American College of Medical Genetics*.
7. Monies, D., Abouelhoda, M., AlSayed, M., Alhassnan, Z., Alotaibi, M., Kayyali, H., Al-Owain, M., Shah, A., Rahbeeni, Z., Al-Muhaizea, M.A., et al. (2017). The landscape of genetic diseases in Saudi Arabia based on the first 1000 diagnostic panels and exomes. *Hum Genet* 136, 921-939.
